# Supplementary material for: Effect of Rhizobium Seed Inoculation on Grain Legume Yield and Protein Content – a Systematic Review and Meta-Analysis
Source: Preprints.org preprint supplement (doi:10.20944/preprints202404.0344.v1), 2024-04-04
Supplement: Supplementary file 1 [file supplementary]

Supplementary Material for Review

Effect of *Rhizobium* seed inoculation on grain legume yield and protein content – a systematic review and meta-analysis

Enas Khalid Sufar 1*, Gultekin Hasanaliyeva 1,2, Juan Wang 2,3, Paul Bilsborrow 4, Leonidas Rempelos 5, Nikolaos Volakakis 1,6, Marcin Barański7* and Carlo Leifert 8,9*

1 Nafferton Ecological Farming Group, Newcastle University, Newcastle upon Tyne, Tyne and Wear, NE1 7RU, UK. [Enas-KH.Sufar@newcastle.ac.uk](mailto:Enas-KH.Sufar@newcastle.ac.uk)

2 School of Animal, Rural and Environmental Sciences, Nottingham Trent University, Brackenhurst Campus, Nottinghamshire, NG25 0QF, UK. [gultekin.hasanaliyeva@ntu.ac.uk](mailto:gultekin.hasanaliyeva@ntu.ac.uk)

3 Department of Clinical Nutrition, School of Medicine, Shanghai Jiao Tong University, Shanghai 200025, China. [j.wang28@outlook.com](mailto:j.wang28@outlook.com)

4 School of Natural and Environmental Sciences, Newcastle University, Newcastle upon Tyne, NE1 7RU, UK. [paul.bilsborrow@newcastle.ac.uk](mailto:paul.bilsborrow@newcastle.ac.uk)

5 Lincoln Institute for Agri-Food Technology, University of Lincoln, Lincoln, Lincolnshire. LN2 2LG, UK. [lrempelos@lincoln.ac.uk](mailto:lrempelos@lincoln.ac.uk)

6 Geokomi plc, P.O. Box 21, Sivas Festos, GR70200, Crete, Greece. [nvolakakis@gmail.com](mailto:nvolakakis@gmail.com)

7 Laboratory of Neurobiology, Nencki Institute, 3 Pasteur Street, 02-093 Warsaw, Poland; [m.baranski@nencki.edu.pl](mailto:m.baranski@nencki.edu.pl)

8 Department of Nutrition, IMB, University of Oslo, 0317 Oslo, Norway.

9 SCU Plant Science, Southern Cross University, Military Rd., Lismore, NSW 2480, Australia; [carlo.leifert@gmail.com](mailto:carlo.leifert@gmail.com)

***** Correspondence: [Enas-KH.Sufar@newcastle.ac.uk](mailto:Enas-KH.Sufar@newcastle.ac.uk) (EKS); [m.baranski@nencki.edu.pl](mailto:m.baranski@nencki.edu.pl) (MB); [carlo.leifert@gmail.com](mailto:carlo.leifert@gmail.com) (CL)

|  |
| --- |
| **Supplementary Fig. S1.** Number of articles included in the meta-analysis by year of publication |

|  |
| --- |
| **Supplementary Fig. S2.** Number of articles from which data were extracted for meta-analysis by country (field experiments only). |

| 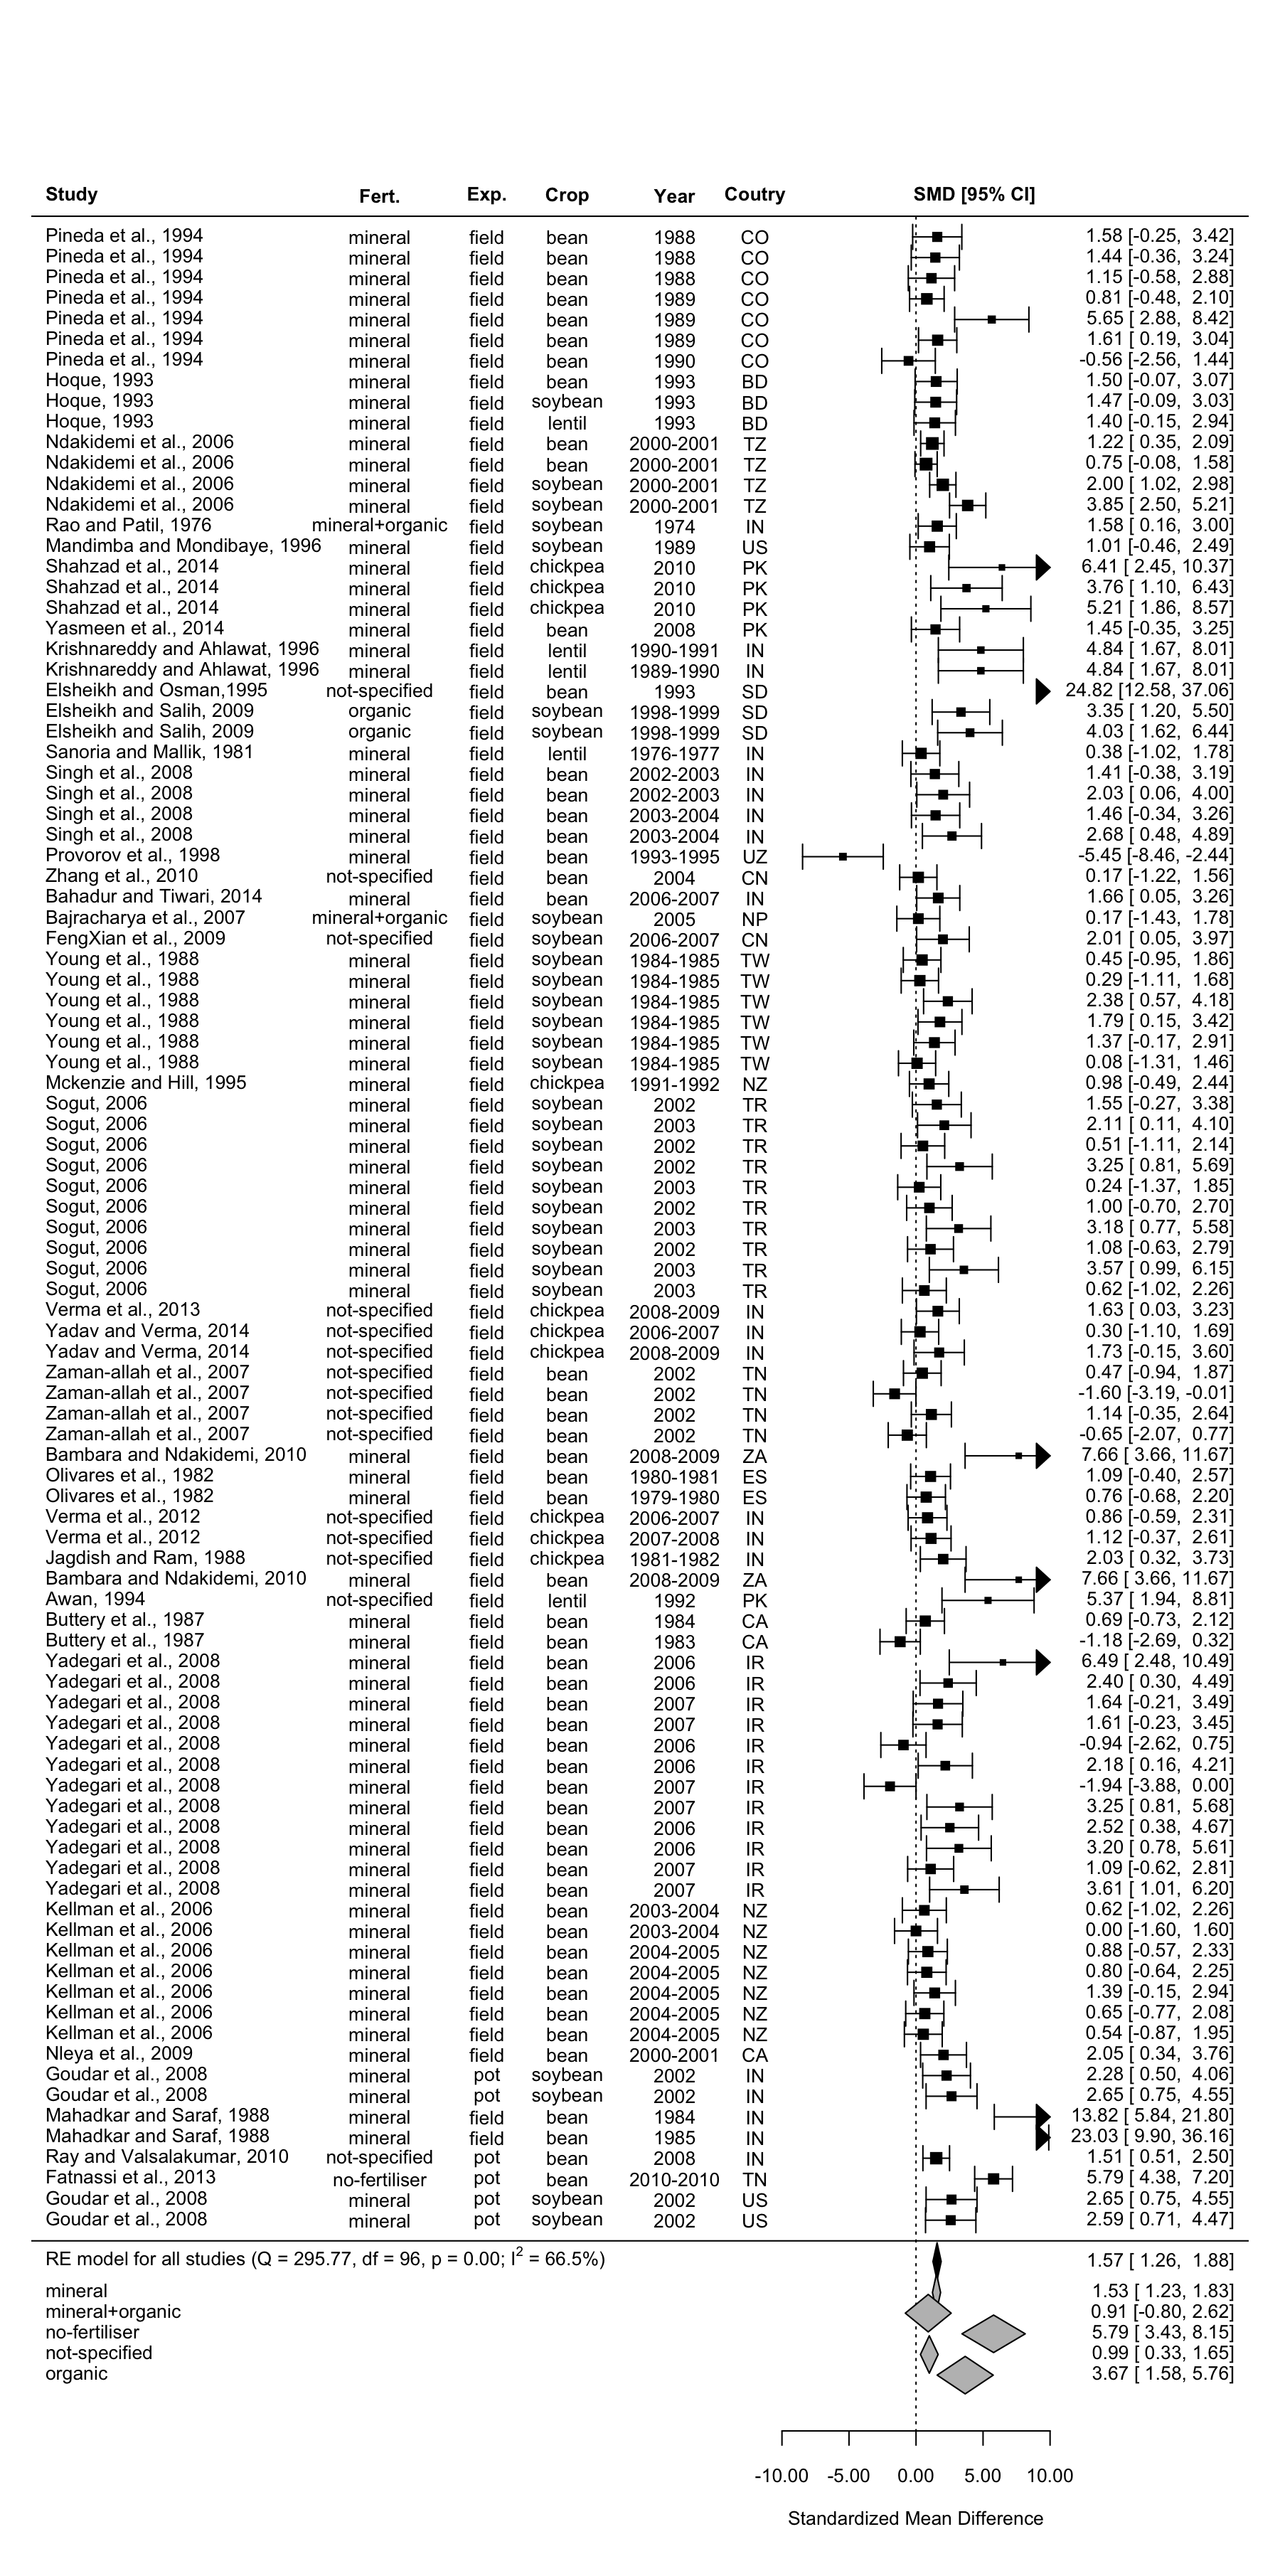 |
| --- |
| **Supplementary Fig. S3.** Forest Plot showing standardized mean differences (SMD) and 95% confidence intervals of comparisons of grain/seed yields in rhizobium-inoculated and non-inoculated legume crops in studies/experiments included in the standard random effect model-based weighted meta-analysis. The average SMDs for studies/experiments that used different types of fertilizer are presented at the bottom of the figure. A positive SMD indicates higher and a negative SMD lower grain yield in rhizobium inoculated crops. Fert., fertilizer type(s) used; Exp., Experiment type; Crop, Grain legume species used; year, year(s) in which experiment(s) were carried out. |

| 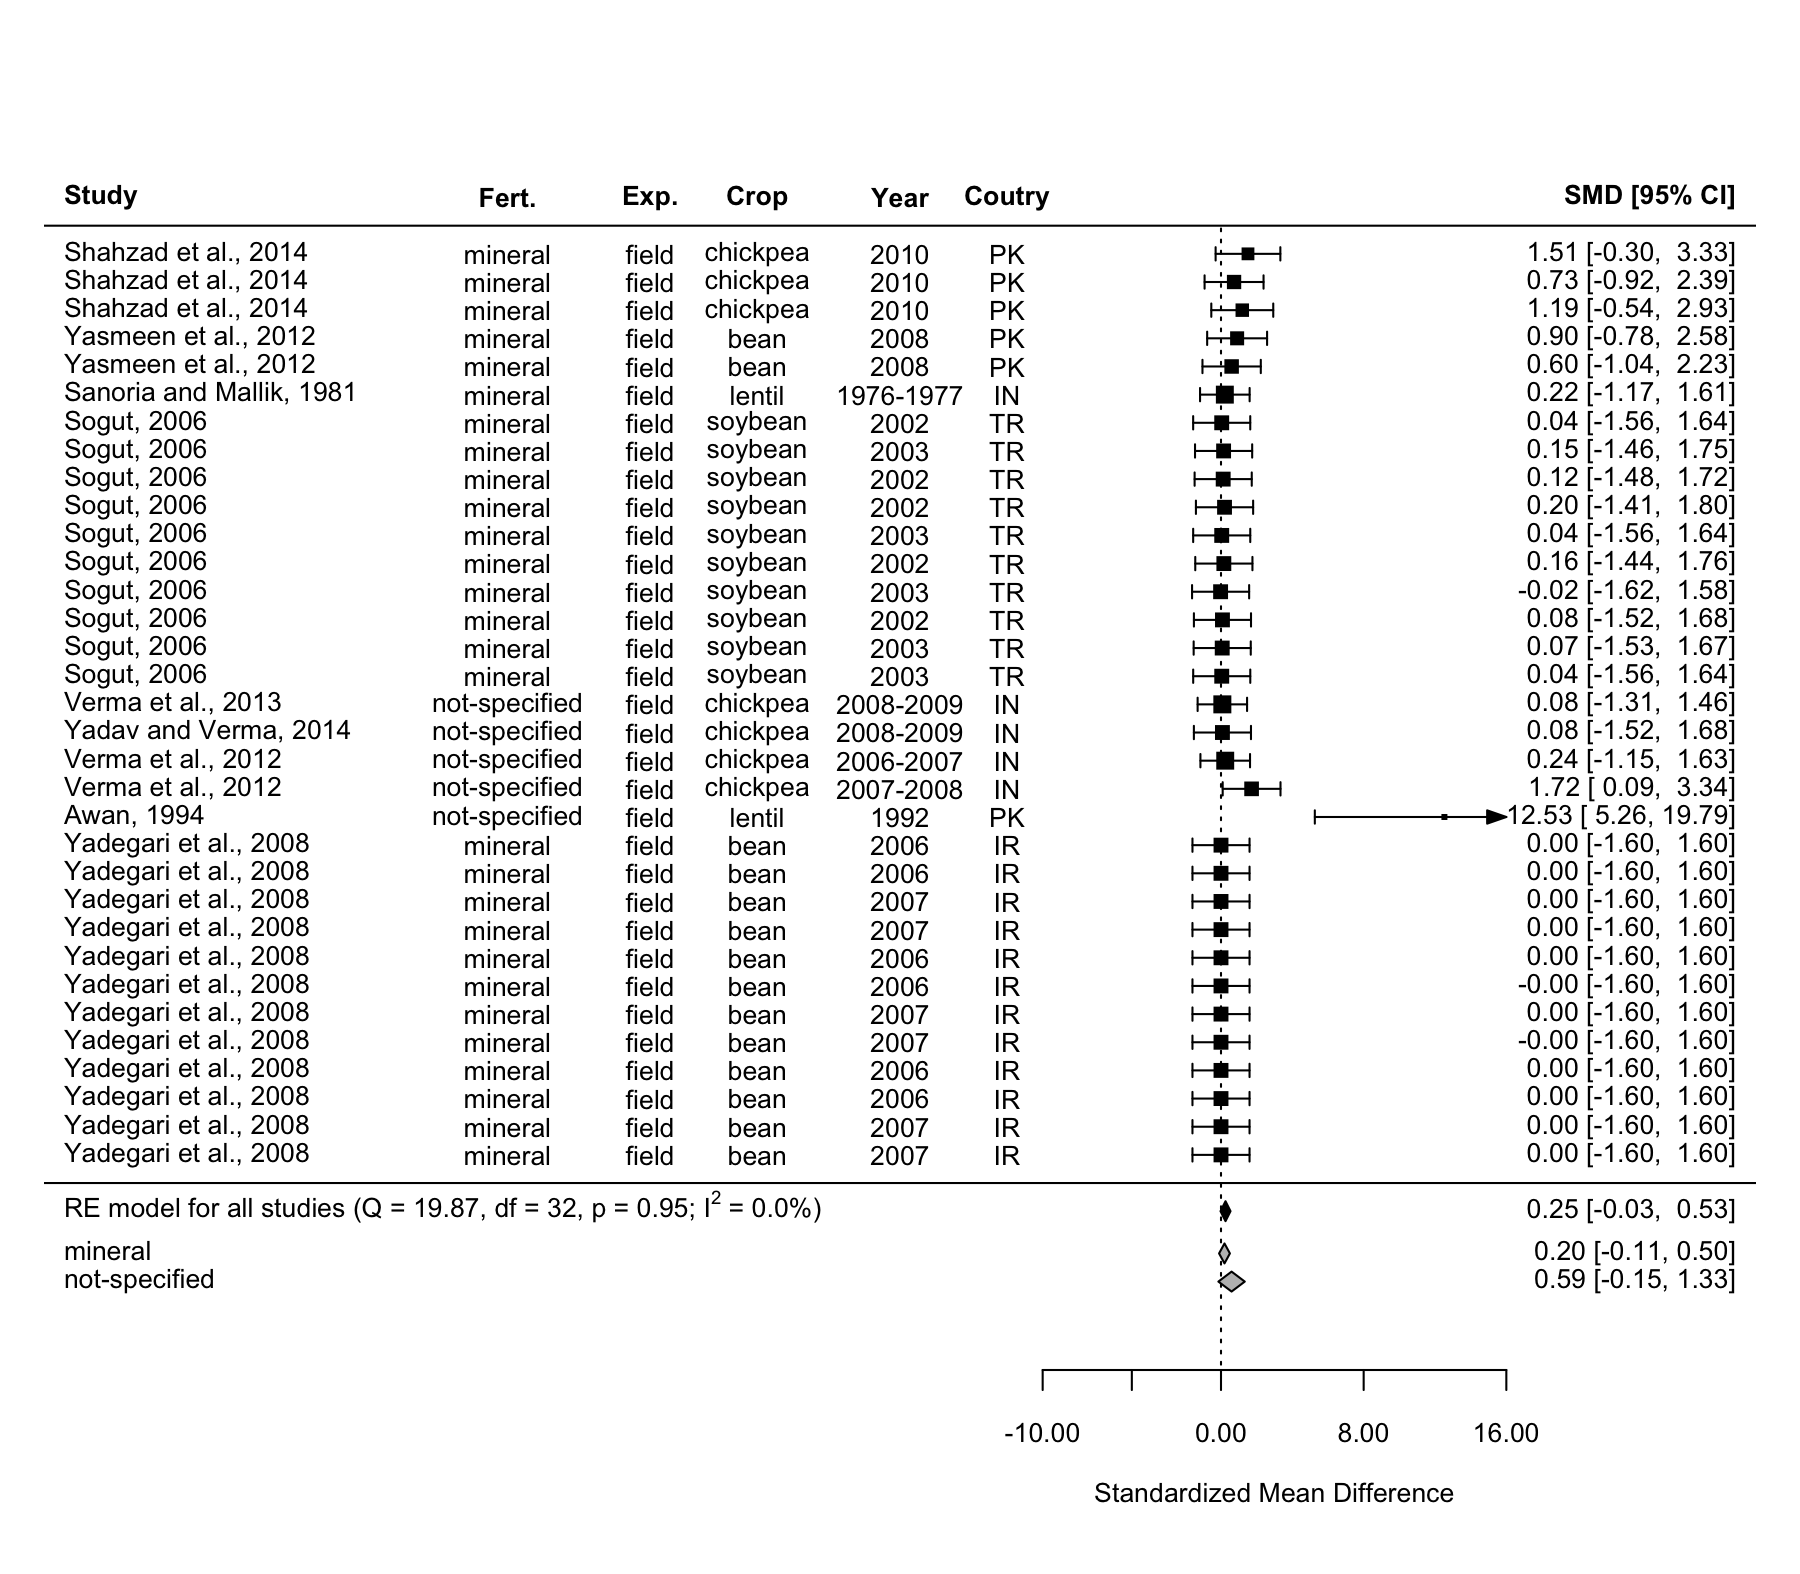 |
| --- |
| **Supplementary Fig. S4.** Forest Plot showing standardized mean differences (SMD) and 95% confidence intervals of comparisons of grain protein content in rhizobium inoculated and non-inoculated legume crops in studies/experiments included in the standard random effect model-based weighted meta-analysis. The average SMDs for studies/experiments that used different types of fertilizer are presented at the bottom of the figure. A positive SMD indicates higher and a negative SMD lower grain yield in rhizobium inoculated crops. Fert., fertilizer type(s) used; Exp., Experiment type; Crop, Grain legume species used; year, year(s) in which experiment(s) were carried out. |

| **Supplementary Table S1.**  Article quality assessment results of publications that provided data for the weighted meta-analyses | | | | |
| --- | --- | --- | --- | --- |
| **Article**  **Assessment criteria** | Awan (1994) | Bahadur & Tiwari (2014) | Bajracharya et al. (2007) | Bambara &  Ndakidemi (2010) |
| **Study overview** |  |  |  |  |
| The study addresses agronomic question/hypothesis | yes | no | yes | yes |
| The type of study is clearly explained (field experiment, pot trial, farm survey) | yes | yes | yes | yes |
| **Internal validity** |  |  |  |  |
| Comparison is made between appropriate agronomic systems in terms of question/hypothesis | yes | yes | yes | yes |
| The number of replicates (sample size) is described | yes | yes | yes | yes |
| The number of replicates (sample size) is sufficient for statistical evaluation | yes | yes | yes | yes |
| The number of replicates (sample size) is the same or similar for all agronomic systems | yes | yes | yes | yes |
| Each agronomic system is sufficiently described | yes | yes | no | yes |
| The geographic location of the experiment is the same for all agronomic systems | yes | yes | yes | yes |
| The season and cultivation conditions (e.g. climate, soil properties) are the same or  similar for all agronomic systems, except factors used to test question/hypothesis | yes | yes | yes | yes |
| The variety of plants used in the study is the same for all agronomic systems | yes | yes | yes | yes |
| **Analytical methods** |  |  |  |  |
| Samples selection is described | yes | no | yes | yes |
| Samples selection is the same for all agronomic systems | yes | no | no | no |
| The post-sampling storage time and conditions are described | yes | yes | no | no |
| The post-sampling storage time and conditions are the same for all agronomic systems | yes | yes | yes | no |
| Choice of statistical methods is appropriate | yes | yes | yes | yes |
| **Results** |  |  |  |  |
| Outcome measures are reliable and adequate to test question/hypothesis | yes | yes | yes | yes |
| Effect sizes are given as mean or median values for each agronomic system | yes | yes | yes | yes |
| The measurement of variance is provided for each mean (as confidence intervals, standard error, etc.) | yes | yes | yes | yes |
| All outcome measures described in the methods section are reported (in tables, figures or text) | yes | yes | yes | yes |
| **Overall assessment** |  |  |  |  |
| The limitation of the study design is discussed | no | no | no | no |
| Authors discuss whether an effect found in study can be seen in the real life | no | no | no | no |
| Study successfully minimizes the risk of bias or confounding | yes | yes | yes | yes |
| There is clear evidence of an association between agronomic systems and outcome | yes | yes | yes | yes |
| The sponsorship/conflict of interest is reported | no | no | no | no |
| Final Rating | high | high | high | acceptable |
| **Supplementary Table S1 cont.**  Article quality assessment results of publications that provided data for the weighted meta-analyses | | | | |
| **Article**  **Assessment criteria** | Buttery et al. (1987) | Elsheikh & Osman (1995) | Elsheikh et al. (2009) | Fatnassi et al. (2013) |
| **Study overview** |  |  |  |  |
| The study addresses agronomic question/hypothesis | yes | yes | yes | unclear |
| The type of study is clearly explained (field experiment, pot trial, farm survey) | yes | yes | yes | yes |
| **Internal validity** |  |  |  |  |
| Comparison is made between appropriate agronomic systems in terms of question/hypothesis | yes | yes | yes | yes |
| The number of replicates (sample size) is described | yes | yes | yes | yes |
| The number of replicates (sample size) is sufficient for statistical evaluation | yes | yes | yes | yes |
| The number of replicates (sample size) is the same or similar for all agronomic systems | yes | yes | yes | yes |
| Each agronomic system is sufficiently described | yes | yes | yes | yes |
| The geographic location of the experiment is the same for all agronomic systems | yes | yes | yes | yes |
| The season and cultivation conditions (e.g. climate, soil properties) are the same or  similar for all agronomic systems, except factors used to test question/hypothesis | yes | yes | yes | yes |
| The variety of plants used in the study is the same for all agronomic systems | yes | yes | yes | yes |
| **Analytical methods** |  |  |  |  |
| Samples selection is described | yes | yes | no | yes |
| Samples selection is the same for all agronomic systems | yes | no | no | no |
| The post-sampling storage time and conditions are described | no | no | no | yes |
| The post-sampling storage time and conditions are the same for all agronomic systems | yes | yes | no | no |
| Choice of statistical methods is appropriate | yes | unclear | yes | yes |
| **Results** |  |  |  |  |
| Outcome measures are reliable and adequate to test question/hypothesis | yes | yes | yes | yes |
| Effect sizes are given as mean or median values for each agronomic system | yes | yes | yes | yes |
| The measurement of variance is provided for each mean (as confidence intervals, standard error, etc.) | yes | no | yes | yes |
| All outcome measures described in the methods section are reported (in tables, figures or text) | yes | yes | yes | yes |
| **Overall assessment** |  |  |  |  |
| The limitation of the study design is discussed | no | no | no | no |
| Authors discuss whether an effect found in study can be seen in the real life | no | yes | no | no |
| Study successfully minimizes the risk of bias or confounding | yes | yes | yes | yes |
| There is clear evidence of an association between agronomic systems and outcome | yes | yes | yes | yes |
| The sponsorship/conflict of interest is reported | no | no | no | no |
| Final Rating | high | acceptable | acceptable | acceptable |

| **Supplementary Table S1 cont.**  Article quality assessment results of publications that provided data for the weighted meta-analyses | | | | |
| --- | --- | --- | --- | --- |
| **Article**  **Assessment criteria** | FengXian et al. (2009) | Goudar et al. (2008) | Hoque (1993) | Jagdish & Ram  (1988) |
| **Study overview** |  |  |  |  |
| The study addresses agronomic question/hypothesis | yes | yes | yes | yes |
| The type of study is clearly explained (field experiment, pot trial, farm survey) | yes | yes | yes | yes |
| **Internal validity** |  |  |  |  |
| Comparison is made between appropriate agronomic systems in terms of question/hypothesis | yes | yes | yes | yes |
| The number of replicates (sample size) is described | no | yes | yes | yes |
| The number of replicates (sample size) is sufficient for statistical evaluation | yes | yes | yes | yes |
| The number of replicates (sample size) is the same or similar for all agronomic systems | yes | yes | yes | yes |
| Each agronomic system is sufficiently described | no | yes | yes | yes |
| The geographic location of the experiment is the same for all agronomic systems | yes | yes | yes | yes |
| The season and cultivation conditions (e.g. climate, soil properties) are the same or  similar for all agronomic systems, except factors used to test question/hypothesis | yes | yes | yes | yes |
| The variety of plants used in the study is the same for all agronomic systems | yes | yes | yes | yes |
| **Analytical methods** |  |  |  |  |
| Samples selection is described | yes | no | yes | yes |
| Samples selection is the same for all agronomic systems | no | no | yes | yes |
| The post-sampling storage time and conditions are described | no | no | yes | no |
| The post-sampling storage time and conditions are the same for all agronomic systems | yes | unclear | yes | yes |
| Choice of statistical methods is appropriate | yes | unclear | no | yes |
| **Results** |  |  |  |  |
| Outcome measures are reliable and adequate to test question/hypothesis | yes | yes | yes | yes |
| Effect sizes are given as mean or median values for each agronomic system | yes | yes | yes | yes |
| The measurement of variance is provided for each mean (as confidence intervals, standard error, etc.) | yes | yes | yes | yes |
| All outcome measures described in the methods section are reported (in tables, figures or text) | yes | yes | yes | yes |
| **Overall assessment** |  |  |  |  |
| The limitation of the study design is discussed | no | no | no | no |
| Authors discuss whether an effect found in study can be seen in the real life | yes | no | yes | no |
| Study successfully minimizes the risk of bias or confounding | yes | yes | yes | yes |
| There is clear evidence of an association between agronomic systems and outcome | yes | yes | yes | yes |
| The sponsorship/conflict of interest is reported | no | no | no | no |
| Final Rating | acceptable | acceptable | high | high |

| **Supplementary Table S1 cont.**  Article quality assessment results of publications that provided data for the weighted meta-analyses | | | | |
| --- | --- | --- | --- | --- |
| **Article**  **Assessment criteria** | Kellman et al. (2006) | Krishnareddy & Ahlawat (1996) | Mahadkar & Saraf (1988) | Mandimba & Mondibaye (1996) |
| **Study overview** |  |  |  |  |
| The study addresses agronomic question/hypothesis | yes | yes | yes | yes |
| The type of study is clearly explained (field experiment, pot trial, farm survey) | yes | yes | yes | yes |
| **Internal validity** |  |  |  |  |
| Comparison is made between appropriate agronomic systems in terms of question/hypothesis | yes | yes | yes | yes |
| The number of replicates (sample size) is described | yes | yes | yes | yes |
| The number of replicates (sample size) is sufficient for statistical evaluation | yes | yes | yes | yes |
| The number of replicates (sample size) is the same or similar for all agronomic systems | yes | yes | yes | yes |
| Each agronomic system is sufficiently described | no | no | no | yes |
| The geographic location of the experiment is the same for all agronomic systems | yes | yes | yes | yes |
| The season and cultivation conditions (e.g. climate, soil properties) are the same or  similar for all agronomic systems, except factors used to test question/hypothesis | yes | yes | yes | yes |
| The variety of plants used in the study is the same for all agronomic systems | yes | yes | yes | yes |
| **Analytical methods** |  |  |  |  |
| Samples selection is described | yes | no | no | no |
| Samples selection is the same for all agronomic systems | no | no | unclear | no |
| The post-sampling storage time and conditions are described | yes | no | no | no |
| The post-sampling storage time and conditions are the same for all agronomic systems | yes | no | unclear | no |
| Choice of statistical methods is appropriate | yes | no | unclear | unclear |
| **Results** |  |  |  |  |
| Outcome measures are reliable and adequate to test question/hypothesis | yes | yes | yes | yes |
| Effect sizes are given as mean or median values for each agronomic system | yes | yes | yes | yes |
| The measurement of variance is provided for each mean (as confidence intervals, standard error, etc.) | yes | no | yes | no |
| All outcome measures described in the methods section are reported (in tables, figures or text) | yes | yes | yes | yes |
| **Overall assessment** |  |  |  |  |
| The limitation of the study design is discussed | no | no | no | no |
| Authors discuss whether an effect found in study can be seen in the real life | no | no | no | no |
| Study successfully minimizes the risk of bias or confounding | yes | yes | yes | yes |
| There is clear evidence of an association between agronomic systems and outcome | yes | yes | yes | yes |
| The sponsorship/conflict of interest is reported | no | no | no | no |
| Final Rating | high | acceptable | acceptable | acceptable |

| **Supplementary Table S1 cont.**  Article quality assessment results of publications that provided data for the weighted meta-analyses | | | | |
| --- | --- | --- | --- | --- |
| **Article**  **Assessment criteria** | McKenzie & Hill (1995) | Ndakidemi et al. (2006) | Nleya et al. (2009) | Olivares et al. (1982) |
| **Study overview** |  |  |  |  |
| The study addresses agronomic question/hypothesis | yes | yes | yes | yes |
| The type of study is clearly explained (field experiment, pot trial, farm survey) | yes | yes | yes | yes |
| **Internal validity** |  |  |  |  |
| Comparison is made between appropriate agronomic systems in terms of question/hypothesis | yes | yes | yes | yes |
| The number of replicates (sample size) is described | yes | yes | yes | yes |
| The number of replicates (sample size) is sufficient for statistical evaluation | yes | yes | yes | yes |
| The number of replicates (sample size) is the same or similar for all agronomic systems | yes | yes | yes | yes |
| Each agronomic system is sufficiently described | no | no | no | no |
| The geographic location of the experiment is the same for all agronomic systems | yes | yes | yes | yes |
| The season and cultivation conditions (e.g. climate, soil properties) are the same or  similar for all agronomic systems, except factors used to test question/hypothesis | yes | yes | yes | yes |
| The variety of plants used in the study is the same for all agronomic systems | yes | yes | yes | yes |
| **Analytical methods** |  |  |  |  |
| Samples selection is described | yes | yes | no | no |
| Samples selection is the same for all agronomic systems | no | no | no | no |
| The post-sampling storage time and conditions are described | no | no | no | no |
| The post-sampling storage time and conditions are the same for all agronomic systems | no | yes | no | no |
| Choice of statistical methods is appropriate | yes | yes | unclear | unclear |
| **Results** |  |  |  |  |
| Outcome measures are reliable and adequate to test question/hypothesis | yes | yes | yes | yes |
| Effect sizes are given as mean or median values for each agronomic system | yes | yes | yes | yes |
| The measurement of variance is provided for each mean (as confidence intervals, standard error, etc.) | yes | yes | yes | yes |
| All outcome measures described in the methods section are reported (in tables, figures or text) | yes | yes | yes | unclear |
| **Overall assessment** |  |  |  |  |
| The limitation of the study design is discussed | no | no | no | no |
| Authors discuss whether an effect found in study can be seen in the real life | no | no | no | no |
| Study successfully minimizes the risk of bias or confounding | yes | yes | yes | yes |
| There is clear evidence of an association between agronomic systems and outcome | yes | yes | yes | yes |
| The sponsorship/conflict of interest is reported | no | no | no | no |
| Final Rating | acceptable | high | acceptable | acceptable |

| **Supplementary Table S1 cont.**  Article quality assessment results of publications that provided data for the weighted meta-analyses | | | | |
| --- | --- | --- | --- | --- |
| **Article**  **Assessment criteria** | Pineda et al. (1994) | Provorov et al. (1998) | Rao & Patil (1976) | Ray & Valsalakumar (2010) |
| **Study overview** |  |  |  |  |
| The study addresses agronomic question/hypothesis | yes | yes | yes | yes |
| The type of study is clearly explained (field experiment, pot trial, farm survey) | yes | yes | yes | yes |
| **Internal validity** |  |  |  |  |
| Comparison is made between appropriate agronomic systems in terms of question/hypothesis | yes | yes | yes | yes |
| The number of replicates (sample size) is described | no | yes | yes | yes |
| The number of replicates (sample size) is sufficient for statistical evaluation | no | yes | yes | yes |
| The number of replicates (sample size) is the same or similar for all agronomic systems | yes | yes | yes | yes |
| Each agronomic system is sufficiently described | no | no | no | yes |
| The geographic location of the experiment is the same for all agronomic systems | yes | yes | yes | yes |
| The season and cultivation conditions (e.g. climate, soil properties) are the same or  similar for all agronomic systems, except factors used to test question/hypothesis | yes | yes | yes | yes |
| The variety of plants used in the study is the same for all agronomic systems | yes | yes | yes | yes |
| **Analytical methods** |  |  |  |  |
| Samples selection is described | no | no | no | yes |
| Samples selection is the same for all agronomic systems | no | no | no | yes |
| The post-sampling storage time and conditions are described | no | no | yes | no |
| The post-sampling storage time and conditions are the same for all agronomic systems | yes | no | no | unclear |
| Choice of statistical methods is appropriate | yes | yes | unclear | yes |
| **Results** |  |  |  |  |
| Outcome measures are reliable and adequate to test question/hypothesis | yes | yes | yes | yes |
| Effect sizes are given as mean or median values for each agronomic system | yes | yes | yes | yes |
| The measurement of variance is provided for each mean (as confidence intervals, standard error, etc.) | no | yes | yes | yes |
| All outcome measures described in the methods section are reported (in tables, figures or text) | yes | yes | yes | yes |
| **Overall assessment** |  |  |  |  |
| The limitation of the study design is discussed | no | no | no | no |
| Authors discuss whether an effect found in study can be seen in the real life | no | no | no | no |
| Study successfully minimizes the risk of bias or confounding | yes | yes | yes | yes |
| There is clear evidence of an association between agronomic systems and outcome | yes | yes | yes | yes |
| The sponsorship/conflict of interest is reported | no | no | no | no |
| Final Rating | acceptable | acceptable | high | high |

| **Supplementary Table S1 cont.**  Article quality assessment results of publications that provided data for the weighted meta-analyses | | | | |
| --- | --- | --- | --- | --- |
| **Article**  **Assessment criteria** | Sanoria & Mallik (1981) | Shahzad et al. (2014) | Singh et al. (2008) | Sogut (2006) |
| **Study overview** |  |  |  |  |
| The study addresses agronomic question/hypothesis | yes | yes | yes | yes |
| The type of study is clearly explained (field experiment, pot trial, farm survey) | yes | yes | yes | yes |
| **Internal validity** |  |  |  |  |
| Comparison is made between appropriate agronomic systems in terms of question/hypothesis | yes | yes | yes | yes |
| The number of replicates (sample size) is described | yes | yes | yes | yes |
| The number of replicates (sample size) is sufficient for statistical evaluation | yes | yes | yes | yes |
| The number of replicates (sample size) is the same or similar for all agronomic systems | yes | yes | yes | yes |
| Each agronomic system is sufficiently described | unclear | yes | yes | yes |
| The geographic location of the experiment is the same for all agronomic systems | yes | yes | yes | yes |
| The season and cultivation conditions (e.g. climate, soil properties) are the same or  similar for all agronomic systems, except factors used to test question/hypothesis | yes | yes | yes | yes |
| The variety of plants used in the study is the same for all agronomic systems | yes | yes | yes | yes |
| **Analytical methods** |  |  |  |  |
| Samples selection is described | yes | yes | yes | yes |
| Samples selection is the same for all agronomic systems | no | no | no | no |
| The post-sampling storage time and conditions are described | no | no | no | yes |
| The post-sampling storage time and conditions are the same for all agronomic systems | no | no | no | no |
| Choice of statistical methods is appropriate | yes | yes | yes | yes |
| **Results** |  |  |  |  |
| Outcome measures are reliable and adequate to test question/hypothesis | yes | yes | yes | yes |
| Effect sizes are given as mean or median values for each agronomic system | yes | yes | yes | yes |
| The measurement of variance is provided for each mean (as confidence intervals, standard error, etc.) | no | no | yes | no |
| All outcome measures described in the methods section are reported (in tables, figures or text) | yes | yes | yes | yes |
| **Overall assessment** |  |  |  |  |
| The limitation of the study design is discussed | no | no | no | no |
| Authors discuss whether an effect found in study can be seen in the real life | no | no | yes | no |
| Study successfully minimizes the risk of bias or confounding | yes | yes | yes | yes |
| There is clear evidence of an association between agronomic systems and outcome | yes | yes | yes | yes |
| The sponsorship/conflict of interest is reported | no | no | no | no |
| Final Rating | acceptable | acceptable | acceptable | high |

| **Supplementary Table S1 cont.**  Article quality assessment results of publications that provided data for the weighted meta-analyses | | | | |
| --- | --- | --- | --- | --- |
| **Article**  **Assessment criteria** | Verma et al. (2012) | Verma et al. (2013) | Yadav & Verma (2014) | Yadegari et al. (2008) |
| **Study overview** |  |  |  |  |
| The study addresses agronomic question/hypothesis | yes | yes | yes | yes |
| The type of study is clearly explained (field experiment, pot trial, farm survey) | yes | yes | yes | yes |
| **Internal validity** |  |  |  |  |
| Comparison is made between appropriate agronomic systems in terms of question/hypothesis | yes | yes | yes | yes |
| The number of replicates (sample size) is described | yes | yes | yes | yes |
| The number of replicates (sample size) is sufficient for statistical evaluation | yes | yes | yes | yes |
| The number of replicates (sample size) is the same or similar for all agronomic systems | yes | yes | yes | yes |
| Each agronomic system is sufficiently described | yes | yes | yes | no |
| The geographic location of the experiment is the same for all agronomic systems | yes | yes | yes | yes |
| The season and cultivation conditions (e.g. climate, soil properties) are the same or  similar for all agronomic systems, except factors used to test question/hypothesis | yes | yes | yes | yes |
| The variety of plants used in the study is the same for all agronomic systems |  | yes | yes | yes |
| **Analytical methods** |  |  |  |  |
| Samples selection is described | yes | yes | yes | yes |
| Samples selection is the same for all agronomic systems | no | no | no | no |
| The post-sampling storage time and conditions are described | yes | yes | yes | yes |
| The post-sampling storage time and conditions are the same for all agronomic systems | no | no | no | no |
| Choice of statistical methods is appropriate | yes | yes | yes | yes |
| **Results** |  |  |  |  |
| Outcome measures are reliable and adequate to test question/hypothesis | yes | yes | yes | yes |
| Effect sizes are given as mean or median values for each agronomic system | yes | yes | yes | yes |
| The measurement of variance is provided for each mean (as confidence intervals, standard error, etc.) | no | no | no | yes |
| All outcome measures described in the methods section are reported (in tables, figures or text) | yes | yes | yes | yes |
| **Overall assessment** |  |  |  |  |
| The limitation of the study design is discussed | no | no | no | no |
| Authors discuss whether an effect found in study can be seen in the real life | no | no | no | no |
| Study successfully minimizes the risk of bias or confounding | yes | yes | yes | yes |
| There is clear evidence of an association between agronomic systems and outcome | yes | yes | yes | yes |
| The sponsorship/conflict of interest is reported | no | no | no | no |
| Final Rating | high | high | high | high |

| **Supplementary Table S1 cont.**  Article quality assessment results of publications that provided data for the weighted meta-analyses | | | | |
| --- | --- | --- | --- | --- |
| **Article**  **Assessment criteria** | Yasmeen & Bano (2014) | Yasmeen et al. (2012) | Young et al. (1988) | Zaman-Allah et al. (2007) |
| **Study overview** |  |  |  |  |
| The study addresses agronomic question/hypothesis | yes | yes | yes | yes |
| The type of study is clearly explained (field experiment, pot trial, farm survey) | yes | yes | yes | yes |
| **Internal validity** |  |  |  |  |
| Comparison is made between appropriate agronomic systems in terms of question/hypothesis | yes | yes | yes | yes |
| The number of replicates (sample size) is described | yes | yes | yes | yes |
| The number of replicates (sample size) is sufficient for statistical evaluation | yes | no | yes | yes |
| The number of replicates (sample size) is the same or similar for all agronomic systems | yes | unclear | yes | yes |
| Each agronomic system is sufficiently described | yes | no | no | no |
| The geographic location of the experiment is the same for all agronomic systems | yes | yes | yes | yes |
| The season and cultivation conditions (e.g. climate, soil properties) are the same or  similar for all agronomic systems, except factors used to test question/hypothesis | yes | yes | yes | yes |
| The variety of plants used in the study is the same for all agronomic systems | yes | yes | yes | yes |
| **Analytical methods** |  |  |  |  |
| Samples selection is described | yes | no | yes | no |
| Samples selection is the same for all agronomic systems | no | no | no | no |
| The post-sampling storage time and conditions are described | no | no | no | no |
| The post-sampling storage time and conditions are the same for all agronomic systems | no | no | no | no |
| Choice of statistical methods is appropriate | yes | yes | yes | yes |
| **Results** |  |  |  |  |
| Outcome measures are reliable and adequate to test question/hypothesis | yes | yes | yes | yes |
| Effect sizes are given as mean or median values for each agronomic system | yes | yes | yes | yes |
| The measurement of variance is provided for each mean (as confidence intervals, standard error, etc.) | no | no | yes | no |
| All outcome measures described in the methods section are reported (in tables, figures or text) | yes | yes | yes | yes |
| **Overall assessment** |  |  |  |  |
| The limitation of the study design is discussed | no | no | no | no |
| Authors discuss whether an effect found in study can be seen in the real life | no | no | yes | no |
| Study successfully minimizes the risk of bias or confounding | yes | yes | yes | yes |
| There is clear evidence of an association between agronomic systems and outcome | yes | yes | yes | yes |
| The sponsorship/conflict of interest is reported | no | no | no | no |
| Final Rating | acceptable | acceptable | acceptable | acceptable |

| **Supplementary Table S1 cont.**  Article quality assessment results of publications that provided data for the weighted meta-analyses | | | | |
| --- | --- | --- | --- | --- |
| **Article**  **Assessment criteria** | Zhang et al. (2010) |  |  |  |
| **Study overview** |  |  |  |  |
| The study addresses agronomic question/hypothesis | yes |  |  |  |
| The type of study is clearly explained (field experiment, pot trial, farm survey) | yes |  |  |  |
| **Internal validity** |  |  |  |  |
| Comparison is made between appropriate agronomic systems in terms of question/hypothesis | yes |  |  |  |
| The number of replicates (sample size) is described | yes |  |  |  |
| The number of replicates (sample size) is sufficient for statistical evaluation | yes |  |  |  |
| The number of replicates (sample size) is the same or similar for all agronomic systems | yes |  |  |  |
| Each agronomic system is sufficiently described | no |  |  |  |
| The geographic location of the experiment is the same for all agronomic systems | yes |  |  |  |
| The season and cultivation conditions (e.g. climate, soil properties) are the same or  similar for all agronomic systems, except factors used to test question/hypothesis | yes |  |  |  |
| The variety of plants used in the study is the same for all agronomic systems | yes |  |  |  |
| **Analytical methods** |  |  |  |  |
| Samples selection is described | yes |  |  |  |
| Samples selection is the same for all agronomic systems | no |  |  |  |
| The post-sampling storage time and conditions are described | yes |  |  |  |
| The post-sampling storage time and conditions are the same for all agronomic systems | no |  |  |  |
| Choice of statistical methods is appropriate | yes |  |  |  |
| **Results** |  |  |  |  |
| Outcome measures are reliable and adequate to test question/hypothesis | yes |  |  |  |
| Effect sizes are given as mean or median values for each agronomic system | yes |  |  |  |
| The measurement of variance is provided for each mean (as confidence intervals, standard error, etc.) | yes |  |  |  |
| All outcome measures described in the methods section are reported (in tables, figures or text) | yes |  |  |  |
| **Overall assessment** |  |  |  |  |
| The limitation of the study design is discussed | yes |  |  |  |
| Authors discuss whether an effect found in study can be seen in the real life | no |  |  |  |
| Study successfully minimizes the risk of bias or confounding | yes |  |  |  |
| There is clear evidence of an association between agronomic systems and outcome | yes |  |  |  |
| The sponsorship/conflict of interest is reported | no |  |  |  |
| Final Rating | high |  |  |  |

**Reference List 1.**

Articles that provided data for the weighted meta-analyses that compared grain yields and protein content in rhizobium-inoculated and non-inoculated legume crops

1. Awan, M.F.M. Ontogenic Variation of nodulation, nitrogen-fixation and nitrogen assimilation in lentil (*lens-culinaris medic*) .1. soil characteristics, nodulation and plant-yield. *Acta Physiologiae Plantarum* **1994**, *16*, 163-169.
2. Bahadur, L.; Tiwari, D.D. Nutrient management in mung bean (*Vigna radiata L.*) through sulphur and biofertilizers. *Legume Research* **2014**, *37*, 180-187, doi:10.5958/j.0976-0571.37.2.027.
3. Bajracharya, S.K.; Shercahn, D.P.; Bhattarai, S. Effect of Vermicompost in Combination with Bacterial and Mineral Fertilizers on the Yield of Vegetable Soybean. *Korean Journal of Crop Science* **2007**, *52*, 100-103.
4. Bambara, S.; Ndakidemi, P.A. Phaseolus vulgaris response to Rhizobium inoculation, lime and molybdenum in selected low pH soil in Western Cape, South Africa. *African Journal of Agricultural Research* **2010**, *5*, 1804-1811.
5. Buttery, B.R.; Park, S.J.; Findlay, W.I. Growth and yield of white bean (*Phaseolus-vulgaris L*.) in response to nitrogen, phosphorus and potassium fertilizer and to inoculation with rhizobium. *Can. J. Plant Sci.* **1987**, *67*, 425-432.
6. Elsheikh, E.A.E.; Osman, A.G. *Rhizobium leguminosarum* inoculation decreases damage to faba bean (*Vicia faba*) caused by broad bean mottle bromovirus and bean yellow mosaic potyvirus. *World Journal of Microbiology & Biotechnology* **1995**, *11*, 223-227.
7. Elsheikh, E.A.E.; Salih, S.S.M.; Elhussein, A.A.; Babiker, E.E. Effects of intercropping, Bradyrhizobium inoculation and chicken manure fertilisation on the chemical composition and physical characteristics of soybean seed. *Food Chemistry* **2009**, *112*, 690-694, doi:10.1016/j.foodchem.2008.06.037.
8. Fatnassi, I.C.; Chiboub, M.; Saadani, O.; Jebara, M.; Jebara, S.H. Phytostabilization of moderate copper contaminated soils using co-inoculation of *Vicia faba* with plant growth promoting bacteria. *Journal of Basic Microbiology* **2013**, *55*, 303-311.
9. FengXian, C.; GuiQin, C.; XiuRong, W.; Jing, Z.; XiaoLong, Y.; Hong, L. Isolation and application of effective nitrogen fixation rhizobial strains on low-phosphorus acid soils in South China. *Chinese Science Bulletin* **2009**, *54*, 412-420.
10. Goudar, G.; Mudenoor, M.G.; Savalgi, V.P. Effect of micronutrient supplemented Bradyrhizobium biofertilizers on nodulation, dry matter production and yield of soybean (*Glycine max* (*L*.) merrill)). *Legume Research* **2008**, *31*, 20-25.
11. Hoque, M.S. Bradyrhizobium technology: a promising substitute for chemical nitrogen fertilizer in Bangladesh agriculture. *Plant and Soil* **1993**, *155*, 337-340.
12. Jagdish, P.; Ram, H. Effect of zinc and copper and rhizobium inoculation on nodulation and yield of greengram (*Vigna-radiata*). *Indian Journal of Agricultural Sciences* **1988**, *58*, 230-232.
13. Kellman, A.W.; Hill, G.D.; McKenzie, B.A.; Agronomy Society of New, Z. Is it worth inoculating common bean (*Phaseolus vulgaris L*.)? In *Agronomy New Zealand, Proceedings*; Proceedings of the Agronomy Society of New Zealand; 2006; Volume 36, pp. 24-35.
14. Krishnareddy, S.V.; Ahlawat, I.P.S. Growth and yield response of lentil cultivars to phosphorus, zinc and biofertilizers. *Journal of Agronomy and Crop Science-Zeitschrift Fur Acker Und Pflanzenbau* **1996**, *177*, 49-59.
15. Mahadkar, U.V.; Saraf, C.S. Effect of Rhizobium inoculation, phosphorus and time and methods of nitrogen application on growth and yield of spring blackgram (*Vigna mungo* (*L*.) Hepper) and its residual effect on succeeding fodder sorghum (*Sorghum vulgare L*.). *Journal of Agricultural Science* **1988**, *110*, 677-679.
16. Mandimba, G.R.; Mondibaye, A. Effect of inoculation and N fertilization on soyabean (*Glycine max* (*L*) Merrill) grown in Congo soil. *Biological Agriculture & Horticulture* **1996**, *13*, 197-204.
17. McKenzie, B.A.; Hill, G.D. Growth and yield of two chickpea (*Cicer arietinum L.*) varieties in Canterbury, New Zealand. *New Zealand Journal of Crop and Horticultural Science* **1995**, *23*, 467-474.
18. Ndakidemi, P.A.; Dakora, F.D.; Nkonya, E.M.; Ringo, D.; Mansoor, H. Yield and economic benefits of common bean (*Phaseolus vulgaris*) and soybean (*Glycine max*) inoculation in northern Tanzania. *Aust. J. Exp. Agric.* **2006**, *46*, 571-577.
19. Nleya, T.; Walley, F.L.; Vandenberg, A. Response of Determinate and Indeterminate Common Bean Genotypes to Rhizobium Inoculant in a Short Season Rainfed Production System in the Canadian Prairie. *J. Plant Nutr.* **2009**, *32*, 44-57.
20. Olivares, J.; Martin, E.; Recaldemartinez, L. Effect of nitrogen and sulphur application and seed inoculation with *Rhizobium leguminosarum* on the yield of beans (*Vicia faba*) in field trials. *Journal of Agricultural Science* **1982**, *100*, 149-152.
21. Pineda, P.; Kipenolt, J.A.; Rojas, E. Rhizobium inoculation increases of bean and maize yields in intercrops on farms in the Peruvian Sierra. *Experimental Agriculture* **1994**, *30*, 311-318.
22. Provorov, N.A.; Saimnazarov, U.B.; Bahromov, I.U.; Pulatova, D.Z.; Kozhemyakov, A.P.; Kurbanov, G.A. Effect of rhizobia inoculation on the seed (herbage) production of mungbean (*Phaseolus aureus* Roxb.) grown at Uzbekistan. *Journal of Arid Environments* **1998**, *39*, 569-575.
23. Rao, I.; Patil, R.B. Effect of inoculation with *Rhizobium* and *Azatobacter* on nodulation, growth and yield of soybean. *Current Science* **1976**, *45*, 523-524.
24. Ray, J.G.; Valsalakumar, N. Arbuscular mycorrhizal fungi and *piriformospora indica* individually and in combination with Rhizobium on green gram. *J. Plant Nutr.* **2010**, *33*, 285-298
25. Sanoria, C.L.; Mallik, M.K. The effect of seed inoculation with *Rhizobium* and *Azotobacter* on yield and quality of lentils (*Lens esculenta*). *Journal of Agricultural Science* **1981**, *97*, 237-239.
26. Shahzad, S.M.; Khalid, A.; Arif, M.S.; Riaz, M.; Ashraf, M.; Iqbal, Z.; Yasmeen, T. Co-inoculation integrated with P-enriched compost improved nodulation and growth of Chickpea (*Cicer arietinum L*.) under irrigated and rainfed farming systems. *Biol Fertil Soils* **2014**, *50*, 1-12.
27. Singh, U.; Saad, A.A.; Singh, S.R.; Kamaluddin, S. Influence of genotypes and inoculation method on productivity of lentil (Lens culinaris) under dryland temperate conditions of Kashmir valley. *Indian Journal of Agricultural Sciences* **2008**, *78*, 671-675.
28. Sogut, T. Rhizobium inoculation improves yield and nitrogen accumulation in soybean (*Glycine max*) cultivars better than fertiliser. *New Zealand Journal of Crop and Horticultural Science* **2006**, *34*, 115-120.
29. Verma, J.P.; Yadav, J.; Tiwari, K.N. Enhancement of nodulation and yield of chickpea by co-inoculation of indigenous *Mesorhizobium spp*. and plant growth-promoting rhizobacteria in Eastern Uttar Pradesh. *Communications in Soil Science and Plant Analysis* **2012**, *43*, 605-621.
30. Verma, J.P.; Yadav, J.; Tiwari, K.N.; Kumar, A. Effect of indigenous *Mesorhizobium spp*. and plant growth promoting rhizobacteria on yields and nutrients uptake of chickpea (*Cicer arietinum L.*) under sustainable agriculture. *Ecological Engineering* **2013**, *51*, 282-286.
31. Yadav, J.; Verma, J.P. Effect of seed inoculation with indigenous *Rhizobium* and plant growth promoting rhizobacteria on nutrients uptake and yields of chickpea (*Cicer arietinum L*.). *European Journal of Soil Biology* **2014**, *63*, 70-77.
32. Yadegari, M.; Rahmani, H.A.; Noormohammadi, G.; Ayneband, A. Evaluation of bean (*Phaseolus vulgaris*) seeds inoculation with *Rhizobium phaseoli* and plant growth promoting rhizobacteria on yield and yield components. *Pakistan journal of biological sciences : PJBS* **2008**, *11*, 1935-1939.
33. Yasmeen, S.; Bano, A. Combined effect of Phosphate Solubilizing Microorganisms, *Rhizobium* and *Enterobacter* on root nodulation and physiology of soybean (*Glycine max L*.). *Communications in Soil Science and Plant Analysis* **2014**, *45*, 2373-2384.
34. Yasmeen, T.; Hameed, S.; Tariq, M.; Iqbal, J. *Vigna Radiata* root associated mycorrhizae and their helping bacteria for improving crop productivity. *Pakistan Journal of Botany* **2012**, *44*, 87-94.
35. Young, C.C.; Juang, T.C.; Chao, C.C. Effects of *Rhizobium* and vesicular- arbuscular mycorrhiza inoculations on nodulation, symbiotic nitrogen fixation and soybean yield in subtropical-tropical fields. *Biol Fertil Soils* **1988**, *6*, 165-169.
36. Zaman-Allah, M.; Sifi, B.; L'Taief, B.; El Aouni, M.H.; Drevon, J.J. Rhizobial inoculation and p fertilization response in common bean (*Phaseolus vulgaris*) under glasshouse and field conditions. *Experimental Agriculture* **2007**, *43*, 67-77.
37. Zhang, N.N.; Sun, Y.M.; Li, L.; Wang, E.T.; Chen, W.X.; Yuan, H.L. Effects of intercropping and Rhizobium inoculation on yield and rhizosphere bacterial community of faba bean (*Vicia faba L.*). *Biol Fertil Soils* **2010**, *46*, 625-639.

**Reference List 2.**

Articles that provided data for the unweighted meta-analyses that compared grain yield and protein content in rhizobium-inoculated and non-inoculatedlegume crops

1. Abbasi, M.K.; Majeed, A.; Sadiq, A.; Khan, S.R. Application of *Bradyrhizobium japonicum* and phosphorus fertilization improved growth, yield and nodulation of soybean in the sub-humid hilly region of Azad Jammu and Kashmir, Pakistan. *Plant Production Science* **2008**, *11*, 368-376.

2. Abbasi, M.K.; Manzoor, M.; Tahir, M.M. Efficiency of rhizobium inoculation and p fertilization in enhancing nodulation, seed yield, and phosphorus use efficiency by field grown soybean under hilly region of Rawalakot Azad Jammu and Kashmir, Pakistan. *J. Plant Nutr.* **2010**, *33*, 1080-1102.

3. Ahemad, M.; Khan, M.S. Growth promotion and protection of lentil (*Lens esculenta*) against herbicide stress by Rhizobium species. *Annals of Microbiology* **2010**, *60*, 735-745.

4. Ahmed, F.E. Interactive effect of nitrogen fertilization and rhizobium inoculation on nodulation and yield of soybean (*Glycine max L*. Merrill). *Global Journal Biology, Agriculture & Health Sciences* **2013**, *2*, 169-173.

5. Ahemad, M.; Khan, M.S. Insecticide-tolerant and plant growth promoting *Bradyrhizobium sp* (vigna) improves the growth and yield of greengram *Vigna radiata* (*L*.) Wilczek in insecticide-stressed soils. *Symbiosis* **2011**, *54*, 17-27.

6. Ahemad, M.; Khan, M.S. Productivity of greengram in tebuconazole-stressed soil, by using a tolerant and plant growth-promoting Bradyrhizobium sp MRM6 strain. *Acta Physiologiae Plantarum* **2012**, *34*, 245-254.

7. Afzal, A.; Bano, A.; Fatima, M. Higher soybean yield by inoculation with N-fixing and P-solubilizing bacteria. *Agron. Sustain. Dev.* **2009**, *30*, 487-495.

8. Al-Karaki, G.N. Rhizobium and phosphorus influence on lentil seed protein and lipid. *J. Plant Nutr.* **1999**, *22*, 351-358.

9. Balesevic-Tubic, S.; Dukic, V.; Marinkovic, J.; Dozet, G.; Petrovic, D.K.; Tatic, M. Importance of microbiological fertilizer used in soybean production: Agronomical and biological aspects. *African Journal of Microbiology Research* **2011**, *5*, 4909-4916.

10. Brkic, S.; Milakovic, Z.; Kriestek, A.; Antunovic, M. Pea yield and its quality depending on inoculation, nitrogen and molybdenum fertilization. *Plant Soil and Environment* **2004**, *50*, 39-45.

11. Campo, R.J.; Araujo, R.S.; Hungria, M. Nitrogen fixation with the soybean crop in Brazil: Compatibility between seed treatment with fungicides and bradyrhizobial inoculants. *Symbiosis* **2009**, *48*, 154-163.

12. Campo, R.J.; Araujo, R.S.; Mostasso, F.L.; Hungria, M. In-furrow inoculation of soybean as alternative to fungicide and micronutrient seed treatment. *Rev. Bras. Cienc. Solo* **2010**, *34*, 1103-1112.

13. Cardoso, E.J.B.N.; Nogueira, M.A.; Ferraz, S.M.G. Biological N2 fixation and mineral N in common bean-maize intercropping or sole cropping in Southeastern Brazil. *Experimental Agriculture* **2007**, *43*, 319-330.

14. Carter, J.M.; Gardner, W.K.; Gibson, A.H. Improved growth and yield of faba beans (*Vicia faba* cv. Fiord) by inoculation with strains of *Rhizobium leguminosarium* biovar. *viciae* in acid soils in South-West Victoria *Australian Journal of Agricultural Research* **1994**, *45*, 613-623.

15. Lamptey, S.; Ahiabor, B.D.K.; Yeboah, S.; Asamoah, C. Response of soybean (*Glycine max*) to rhizobial inoculation and Phosphorus application. *Journal of Experimental Biology and Agricultural Sciences* **2014**, *2*, 73-77.

16. Das, S.; Pareek, B.L.; Kumawat, A.; Dhikwal, S.R. Effect of phosphorus and biofertilizers on productivity of chickpea (*Cicer arietinum L*) in north western Rajasthan, India. *Legume Research* **2013**, *36*, 511-514.

17. Delic, D.; Stajkovic-Srbinovic, O.; Kuzmanovic, D.; Rasulic, N.; Mrvic, V.; Andjelovic, S.; Knezevic-Vukcevic, J. Effect of bradyrhizobial inoculation on growth and seed yield of mungbean in Fluvisol and Humofluvisol. *African Journal of Microbiology Research* **2011**, *5*, 3946-3957.

18. Diaz, D.A.R.; Pedersen, P.; Sawyer, J.E. Soybean response to inoculation and nitrogen application following long-term grass pasture. *Crop Sci.* **2009**, *49*, 1058-1062.

19. Egamberdiyeva, D.; Qarshieva, D.; Davranov, K. The use of *Bradyrhizobium* to enhance growth and yield of soybean in calcareous soil in Uzbekistan. *Journal of Plant Growth Regulation* **2004**, *23*, 54-57.

20. El hadi, E.A.; El sheikh, E.A.E. Effect of Rhizobium inoculation and nitrogen fertilization on yield and protein content of six chickpea (*Cicer arietinum L*.) cultivars in marginal soils under irrigation. *Nutr. Cycl. Agroecosyst.* **1999**, *54*, 57-63.

21. Elkoca, E.; Kantar, F.; Sahin, F. Influence of nitrogen fixing and phosphorus solubilizing bacteria on the nodulation, plant growth, and yield of chickpea. *J. Plant Nutr.* **2008**, *31*, 157-171.

22. Elsheikh, E.A.E.; Ibrahim, K.A. The effect of Bradyrhizobium inoculation on yield and seed quality of guar (Cyamopsis tetragonoloba L.). *Food Chemistry* **1999**, *65*, 183-187.

23. Erman, M.; Ari, E.; Togay, Y.; Cig, F. Response of Field Pea (*Pisum sativum sp* Arvense *L.*) to Rhizobium Inoculation and Nitrogen Application in Eastern Anotolia. *Journal of Animal and Veterinary Advances* **2009**, *8*, 612-616.

24. Erman, M.; Demir, S.; Ocak, E.; Tufenkci, S.; Oguz, F.; Akkopru, A. Effects of Rhizobium, arbuscular mycorrhiza and whey applications on some properties in chickpea (*Cicer arietinum L*.) under irrigated and rainfed conditions 1-Yield, yield components, nodulation and AMF colonization. *Field Crops Research* **2011**, *122*, 14-24.

25. Fatima, Z.; Zia, M.; Chaudhary, M.F. Interactive effect of Rhizobium strains and P on soybean yield, nitrogen fixation and soil fertility. *Pakistan Journal of Botany* **2007**, *39*, 255-264.

26. Guene, N.F.D.; Diouf, A.; Gueye, M. *Nitrogen fixation in the common bean (Phaseolus vulgaris) - A multilocational inoculation trial in Senegal*; International Crops Research Institute for the Send-Arid Tropics (ICRISAT): 66 Janpath, New Delhi, 2004; pp. 247-252.

27. Gupta, S.C.; Sahu, S. Response of chickpea to micronutrients and biofertilizers in vertisol. *Legume Research* **2012**, *35*, 248-251.

28. Hakeem, S.A.; Thomas, T.; Wani, S. Effect of different levels of neem cake and biofertilizer on properties of soil, nutrient status and grain yield of black gram (*Vigna mungo L.*) type-9. *Plant Archives* **2007**, *7*, 847-849.

29. Huang, H.C.; Erickson, R.S. Effect of seed treatment with *Rhizobium leguminosarum* on *Pythium* damping-off, seedling height, root nodulation, root biomass, shoot biomass, and seed yield of pea and lentil. *J. Phytopathol.* **2007**, *155*, 31-37.

30. Hungria, M.; Campo, R.J.; Mendes, I.C. Benefits of inoculation of the common bean (*Phaseolus vulgaris*) crop with efficient and competitive Rhizobium tropici strains. *Biol Fertil Soils* **2003**, *39*, 88-93.

31. Hungria, M.; Franchini, J.C.; Campo, R.J.; Crispino, C.C.; Moraes, J.Z.; Sibaldelli, R.N.R.; Mendes, I.C.; Arihara, J. Nitrogen nutrition of soybean in Brazil: Contributions of biological N2 fixation and N fertilizer to grain yield. *Can. J. Plant Sci.* **2006**, *86*, 927-939.

32. Hungria, M.; Nogueira, M.A.; Araujo, R.S. Co-inoculation of soybeans and common beans with rhizobia and azospirilla: strategies to improve sustainability. *Biol Fertil Soils* **2013**, *49*, 791-801.

33. Iqbal, M.A.; Khalid, M.; Shahzad, S.M.; Ahmad, M.; Soleman, N.; Akhtar, N. Integrated use of *Rhizobium leguminosarum*, Plant Growth Promoting Rhizobacteria and Enriched Compost for Improving Growth, Nodulation and Yield of Lentil (*Lens culinaris* Medik.). *Chilean Journal of Agricultural Research* **2012**, *72*, 104-110.

34. Javaid, A. Growth, nodulation and yield of black gram *Vigna mungo* (*L*.) Hepper as influenced by biofertilizers and soil amendments. *African Journal of Biotechnology* **2009**, *8*, 5711-5717.

35. Kadam, S.S.; Kachhave, K.G.; Chavan, J.K.; Salunkhe, D.K. Effect of nitrogen, *Rhizobium* inoculation and simazine on yield and quality of Bengal gram (*Cicer arietinum L*.). *Plant and Soil* **1977**, *47*, 279-281.

36. Kagan, S.; Kayan, N. The influence of inoculation and nitrogen treatments on yield and yield components in chickpea (*Cicer arietinum L.*) cultivars. *Legume Research* **2014**, *37*, 363-371.

37. Kahn, B.A.; Schroeder, J.L. Root characteristics and seed yields of cowpeas grown with and without added nitrogen fertilizer. *Hortscience* **1999**, *34*, 1238-1239.

38. Kanaan, B.A.J.; Saud, H.M.; Ismail, M.R.; Othman, R.; Habib, S.H.; Kausar, H. Influence of molybdenum in association with *Rhizobium* on enhanced biological nitrogen fixation, growth and yield of soybean under drip irrigation system. *Legume Research* **2013**, *36*, 522-527.

39. Kantar, F.; Elkoca, E.; Ogutcu, H.; Algur, O.F. Chickpea yields in relation to *Rhizobium* inoculation from wild chickpea at high altitudes. *Journal of Agronomy and Crop Science* **2003**, *189*, 291-297.

40. Karasu, A.; Oez, M.; Dogan, R. The effect of bacterial inoculation and different nitrogen doses on yield and yield components of some chickpea genotypes (*Cicer arietinum L*.). *African Journal of Biotechnology* **2009**, *8*, 59-64.

41. Karasu, A.; Oz, M.; Dogan, R. The effect of Bacterial Inoculation and Different Nitrogen Doses on Yield and Yield Components of Some Dwarf Dry Bean Cultivars (*Phaseolus vulgaris L*.). *Bulgarian Journal of Agricultural Science* **2011**, *17*, 296-305.

42. Khandelwal, R.; Choudhary, S.K.; Khangarot, S.S.; Jat, M.K.; Singh, P. Effect of inorganic and bio-fertilizers on productivity and nutrients uptake in cowpea [*Vigna unguiculata* (*L*.) Walp]. *Legume Research* **2012**, *35*, 235-238.

43. Koziel, M.; Gebala, B.; Martyniuk, S. Response of Soybean to Seed Inoculation with *Bradyrhizobium japonicum* and with Mixed Inoculants of *B. japonicum* and *Azotobacter chroococcum*. *Polish Journal of Microbiology* **2013**, *62*, 457-460.

44. Kubota, A.; Hoshiba, K.; Bordon, J. Effect of fertilizer-N application and seed coating with rhizobial inoculants on soybean yield in Eastern Paraguay. *Rev. Bras. Cienc. Solo* **2008**, *32*, 1627-1633.

45. Kucuk, C. Inoculation with Rhizobium spp. in kidney bean (*Phaseolus vulgaris L*.) varieties. *Zemdirbyste-Agriculture* **2011**, *98*, 49-56.

46. Kucuk, C.; Kivanc, M. The effect of Rhizobium spp. inoculation on seed quality of bean in Turkey. *Pak J Biol Sci* **2008**, *11*, 1856-1859.

47. Kumar, H.; Dubey, R.C.; Maheshwari, D.K. Effect of plant growth promoting rhizobia on seed germination, growth promotion and suppression of Fusarium wilt of fenugreek (Trigonella foenum-graecum L.). *Crop Protection* **2011**, *30*, 1396-1403.

48. Kumawat, P.K.; Tiwari, R.C.; Golada, S.L.; Godara, A.S.; Garhwal, R.S.; Choudhary, R. Effect of phosphorus sources, levels and biofertilizers on yield attributes, yield and economics of black gram (*Phaseolus Mungo L*.) *Legume Research* **2013**, *36*, 70-73.

49. Kunal; Sharma, P. Compatibility of *Mesorhizobium sp Cicer* with seed treatment of fungicide and insecticide in chickpea. *Archives of Agronomy and Soil Science* **2011**, *58*, 115-123.

50. Kyei-Boahen, S.; Slinkard, A.E.; Walley, F.L. Evaluation of rhizobial inoculation methods for chickpea. *Agronomy Journal* **2002**, *94*, 851-859.

51. Maingi, J.M.; Shisanya, C.A.; Gitonga, N.M.; Hornetz, B. Nitrogen fixation by common bean (*Phaseolus vulgaris L*.) in pure and mixed stands in semi-arid south-east Kenya. *Eur. J. Agron.* **2001**, *14*, 1-12.

52. Malik, M.M.R.; Akhtar, M.J.; Ahmad, I.; Khalid, M. Synergistic use of Rhizobium, compost and nitrogen to improve growth and yield of mungbean (*Vigna radiata*). *Pakistan Journal of Agricultural Sciences* **2014**, *51*, 393-398.

53. Martins, L.M.V.; Xavier, G.R.; Rangel, F.W.; Ribeiro, J.R.A.; Neves, M.C.P.; Morgado, L.B.; Rumjanek, N.G. Contribution of biological nitrogen fixation to cowpea: a strategy for improving grain yield in the semi-arid region of Brazil. *Biol Fertil Soils* **2003**, *38*, 333-339.

54. Martyniuk, S.; Koziel, M.; Gebala, B. Response of yellow lupine to seed inoculation with *Bradyrhizobium sp* (Lupinus) and with mixed inoculants of *Bradyrhizobium sp* and *Azotobacter chroococcum*. *Journal of Food Agriculture & Environment* **2013**, *11*, 393-396.

55. McKenzie, R.H.; Middleton, A.B.; Seward, K.W.; Gaudiel, R.; Wildschut, C.; Bremer, E. Fertilizer responses of dry bean in southern Alberta. *Can. J. Plant Sci.* **2000**, *81*, 343-350.

56. Mnasri, B.; Tajini, F.; Trabelsi, M.; Aouani, M.E.; Mhamdi, R. *Rhizobium gallicum* as an efficient symbiont for bean cultivation. *Agron. Sustain. Dev.* **2007**, *27*, 331-336.

57. Moawad, H.; Eldin, S.; Khalafallah, M.A. Assessment of faba bean (*Vicia faba*) response to inoculation with *Rhizobium leguminosarum* in clay loam Nile Delta soil. *World Journal of Microbiology & Biotechnology* **1991**, *7*, 191-195.

58. Mut, H.; Gulumser, A.; Ayan, I.; Acar, Z.; Basaran, U.; Onal-Asci, O. Effects of cultivar, inoculation, and sowing date in seed yield and yield components of lupin. *J. Plant Nutr.* **2012**, *35*, 1290-1302.

59. Namvar, A.; Sharifi, R.S.; Sedghi, M.; Zakaria, R.A.; Khandan, T.; Eskandarpour, B. Study on the effects of organic and inorganic nitrogen fertilizer on yield, yield components, and nodulation state of chickpea (*Cicer arietinum L*.). *Communications in Soil Science and Plant Analysis* **2011**, *42*, 1097-1109.

60. Mayz, J.; Campos, F.; Valladares, N. Evaluation of rhizobial (Rhizobium sp.) isolates for their effects on cowpea Vigna unguiculata (L.) Walp. growth and yield. *Tropical Agriculture* **2003**, *80*, 36-40.

61. Ngakou, A.; Nkot, L.N.; Doloum, G.; Adamou, S. Mycorrhiza-Rhizobium-Vigna subterranea Dual Symbiosis: Impact of Microbial Symbionts for Growth and Sustainable Yield Improvement. *International Journal of Agriculture and Biology* **2012**, *14*, 915-921.

62. Nleya, T.; Walley, F.; Vandenberg, A. Response of four common bean cultivars to granular inoculant in a short-season dryland production system. *Can. J. Plant Sci.* **2001**, *81*, 385-390.

63. Nunes Marinho, R.d.C.; Abrahao Nobrega, R.S.; Zilli, J.E.; Xavier, G.R.; Fernandes Santos, C.A.; Aidar, S.d.T.; Vieira Martins, L.M.; Fernandes Junior, P.I. Field performance of new cowpea cultivars inoculated with efficient nitrogen-fixing rhizobial strains in the Brazilian Semiarid. *Pesquisa Agropecuaria Brasileira* **2014**, *49*, 395-402.

64. Otsubo, A.A.; Brito, O.R.; Mercante, F.M. Productivity and nodulation of promising lineages of the Carioca bean group inoculated with *Rhizobium tropici* or supplemented with nitrogen fertilizer. *Semina-Ciencias Agrarias* **2013**, *34*, 2763-2775.

65. Pacheco, R.S.; Brito, L.F.; Straliotto, R.; Perez, D.V.; Araujo, A.P. Seeds enriched with phosphorus and molybdenum as a strategy for improving grain yield of common bean crop. *Field Crops Research* **2012**, *136*, 97-106.

66. Pala, M.; Mazid, A. On-farm assessment of improved crop production practices in northwest Syria. I. Chickpea. *Experimental Agriculture* **1991**, *28*, 175-184.

67. Prakamhang, J.; Tittabutr, P.; Boonkerd, N.; Teamtisong, K.; Uchiumi, T.; Abe, M.; Teaumroong, N. Proposed some interactions at molecular level of PGPR coinoculated with B*radyrhizobium diazoefficiens* USDA110 and *B-japonicum* THA6 on soybean symbiosis and its potential of field application. *Applied Soil Ecology* **2015**, *85*, 38-49.

68. Puste, A.M.; Bandyopadhyay, S.; Das, D.K. Economy of fertilizer nitrogen through organic sources in rain-fed rice-legume cropping systems in West Bengal, India. *TheScientificWorldJournal* **2001**, *1 Suppl 2*, 722-727.

69. Qureshi, M.A.; Shakir, M.A.; Iqbal, A.; Akhtar, N.; Khan, A. Co-inoculation of phosphate solubilizing bacteria and rhizobia for improving growth and yield of mungbean (*Vigna Radiata L*.). *Journal of Animal and Plant Sciences* **2011**, *21*, 491-497.

70. Qureshi, M.A.; Shakir, M.A.; Naveed, M.; Ahmad, M.J. Growth and yield response of chickpea to co-inoculation with *Mesorhizobium Ciceri* and *Bacillus Megaterium*. *Journal of Animal and Plant Sciences* **2009**, *19*, 205-211.

71. Solaiman, A.R.M.; Molla, M.N.; Rabbani, M.G. Effects of inoculation of *Rhizobium* and arbuscular mycorrhiza, poultry litter, nitrogen, and phosphorus on growth and yield in chickpea. *Korean Journal of Crop Science* **2005**, *50*, 256-261.

72. Rathi, B.K.; Jain, A.K.; Kumar, S.; Panwar, J.D.S. Response of rhizobium inoculation with sulphur and micronutrients on yield and yield attributes of blackgram *Vigna mungo* (*L*.) hepper. *Legume Research* **2009**, *32*, 62-64.

73. Rathore, V.S.; Singh, J.P.; Soni, M.L.; Beniwal, R.K. Effect of nutrient management on growth, productivity and nutrient uptake of rainfed clusterbean (Cyamopsis tetragonoloba) in arid region. *Indian Journal of Agricultural Sciences* **2007**, *77*, 349-353.

74. Rawat, A.K.; Rao, D.L.N.; Sahu, R.K. Effect of soybean inoculation with *Bradyrhizobium* and wheat inoculation with *Azotobacter* on their productivity and N turnover in a Vertisol. *Archives of Agronomy and Soil Science* **2012**, *59*, 1559-1571.

75. Raychaudhuri, M.; Kumar, K.; Raychaudhuri, S. Effect of *Rhizobium japonicum* and phosphorus on nutrient uptake and yield of soybean (*Glycine max*) in an Ultisol of Manipur hills. *Indian Journal of Agricultural Sciences* **1997**, *67*, 459-462.

76. Raza, S.; Jornsgard, B.; Abdel-Wahab, A.F.; Christiansen, J.L. Effect of combined inoculation strains on growth of lupin on newly reclaimed land in Egypt. *Biol Fertil Soils* **2001**, *34*, 319-324.

77. Rokhzadi, A.; Toashih, V. Nutrient uptake and yield of chickpea (*Cicer arietinum L*.) inoculated with plant growth-promoting rhizobacteria. *Australian Journal of Crop Science* **2011**, *5*, 44-48.

78. Rudresh, D.L.; Shivaprakash, M.K.; Prasad, R.D. Effect of combined application of Rhizobium, phosphate solubilizing bacterium and Trichoderma spp. on growth, nutrient uptake and yield of chickpea (*Cicer aritenium L*.). *Applied Soil Ecology* **2005**, *28*, 139-146.

79. Rufini, M.; Pereira da Silva, M.A.; Avelar Ferreira, P.A.; Cassetari, A.d.S.; Soares, B.L.; Bastos de Andrade, M.J.; de Souza Moreira, F.M. Symbiotic efficiency and identification of rhizobia that nodulate cowpea in a Rhodic Eutrudox. *Biol Fertil Soils* **2014**, *50*, 115-122.

80. Rugheim, A.M.E.; Abdelgani, M.E. *Substituting Chemical Fertilizers with Microbial Fertilizers for Increasing Productivity of Faba Bean (Vicia faba L.) in Arid Lands*; 2009; Volume 2, pp. 1910-1918.

81. Saini, V.K.; Bhandari, S.C.; Tarafdar, J.C. Comparison of crop yield, soil microbial C, N and P, N-fixation, nodulation and mycorrhizal infection in inoculated and non-inoculated sorghum and chickpea crops. *Field Crops Research* **2004**, *89*, 39-47.

82. Sanchez, A.C.; Torres Gutierrez, R.; Santana, R.C.; Urrutia, A.R.; Fauvart, M.; Michiels, J.; Vanderleyden, J. Effects of co-inoculation of native Rhizobium and Pseudomonas strains on growth parameters and yield of two contrasting *Phaseolus vulgaris L*. genotypes under Cuban soil conditions. *European Journal of Soil Biology* **2014**, *62*, 105-112.

83. Sattar, M.A.; Quader, M.A.; Danso, S.K.A. Nodulation, N2 fixation and yield of chickpea as influenced by host cultivar and Bradyrhizobium strain differences. *Soil Biology & Biochemistry* **1995**, *27*, 725-727.

84. Sene, G.; Thiao, M.; Mbaye, R.S.; Ndoye, F.; Kane, A.; Diouf, D.; Sylla, S.N. Response of three peanut cultivars toward inoculation with two Bradyrhizobium strains and an Arbuscular mycorrhizal fungus in Senegal. *African Journal of Microbiology Research* **2010**, *4*, 2520-2527.

85. Shah, N.H.; Hafeez, F.Y.; Arshad, M.; Malik, K.A. Response of lentil to *Rhizobium leguminosarum bv. viciae* strains at different levels of nitrogen and phosphorus. *Aust. J. Exp. Agric.* **2000**, *40*, 93-98.

86. Shisanya, C.A. Improvement of drought adapted tepary bean (*Phaseolus acutifolius* A. Gray var. latifolius) yield through biological nitrogen fixation in semi-arid SE-Kenya. *Eur. J. Agron.* **2002**, *16*, 13-24.

87. Silsbury, J.H. Grain yield of Fiord faba bean in relation to strain of *Rhizobium*. *Aust. J. Exp. Agric.* **1991**, *31*, 251-254.

88. Simanungkalit, R.D.M.; Roughley, R.J.; Hastuti, R.D.; Indrasumunar, A.; Pratiwi, E. Inoculation of soybean with selected strains of *Bradyrhizobium japonicum* can increase yield on acid soils in Indonesia. *Soil Biology & Biochemistry* **1996**, *28*, 257-259.

89. Singh, K.K.; Srinivasarao, C.; Ali, M. Root growth, nodulation, grain yield, and phosphorus use efficiency of lentil as influenced by phosphorus, irrigation, and inoculation. *Communications in Soil Science and Plant Analysis* **2005**, *36*, 1919-1929.

90. Soe, K.M.; Bhromsiri, A.; Karladee, D.; Yamakawa, T. Effects of endophytic actinomycetes and *Bradyrhizobium japonicum* strains on growth, nodulation, nitrogen fixation and seed weight of different soybean varieties. *Soil Science and Plant Nutrition* **2012**, *58*, 319-325.

91. Solaiman, A.R.M.; Molla, M.N.; Hossain, M.D. Response of Chickpea to Dual Inoculation with *Rhizobium* and Arbuscular Mycorrhiza, Nitrogen and Phosphorus. *Korean Journal of Crop Science* **2006**, *51*, 527-533.

92. Soliman, S.; Galal, Y.G.M.; ElGhandour, I.A. Soybean biofertilization in sandy soils of Egypt using N-15 tracer technique. *Folia Microbiologica* **1995**, *40*, 321-326.

93. Tahir, M.M.; Abbasi, M.K.; Rahim, N.; Khaliq, A.; Kazmi, M.H. Effect of *Rhizobium* inoculation and NP fertilization on growth, yield and nodulation of soybean (*Glycine max L*.) in the sub-humid hilly region of Rawalakot Azad Jammu and Kashmir, Pakistan. *African Journal of Biotechnology* **2009**, *8*, 6191-6200.

94. Tajini, F.; Drevon, J.-J.; Lamouchi, L.; Aouani, M.E.; Trabelsi, M. Response of common bean lines to inoculation: comparison between the *Rhizobium tropici* CIAT899 and the native *Rhizobium etli* 12a3 and their persistence in Tunisian soils. *World Journal of Microbiology & Biotechnology* **2008**, *24*, 407-417.

95. Tavasolee, A.; Aliasgharzad, N.; SalehiJouzani, G.; Mardi, M.; Asgharzadeh, A. Interactive effects of Arbuscular mycorrhizal fungi and rhizobial strains on chickpea growth and nutrient content in plant. *African Journal of Biotechnology* **2011**, *10*, 7585-7591.

96. Togay, N.; Togay, Y.; Cimrin, K.M.; Turan, M. Effects of *rhizobium* inoculation, sulfur and phosphorus applications on yield, yield components and nutrient uptakes in chickpea (*Cicer arietinum L*.). *African Journal of Biotechnology* **2008**, *7*, 776-782.

97. Trabelsi, D.; Mengoni, A.; Ben Ammar, H.; Mhamdi, R. Effect of on-field inoculation of *Phaseolus vulgaris* with rhizobia on soil bacterial communities. *FEMS Microbiol. Ecol.* **2011**, *77*, 211-222.

98. Tsigie, A.; Tilak, K.V.B.R.; Saxena, A.K. Field response of legumes to inoculation with plant growth-promoting rhizobacteria. *Biol Fertil Soils* **2011**, *47*, 971-974.

99. Uher, D.; Stafa, Z.; Blazinkov, M.; Sikora, S.; Kaucic, D.; Zupanac, G. Importance of winter pea cv. maksimirski ozimi in production of the milk on family farms in Croatia. *Mljekarstvo* **2008**, *58*, 371-385.

100. Uyanoz, R.; Akbulut, M.; Cetin, U.; Gultepe, N. Effects of microbial inoculation, organic and chemical fertilizer on yield and physicochemical and cookability properties of bean (*Phaseolus vulgaris L*.) seeds. *Philippine Agricultural Scientist* **2007**, *90*, 168-172.

101. Verma, J.P.; Yadav, J.; Tiwari, K.N.; Kumar, A. Effect of indigenous *Mesorhizobium spp*. and plant growth promoting rhizobacteria on yields and nutrients uptake of chickpea (*Cicer arietinum L.*) under sustainable agriculture. *Ecological Engineering* **2013**, *51*, 282-286.

102. Wani, P.A.; Khan, M.S.; Zaidi, A. Synergistic effects of the inoculation with nitrogen-fixing and phosphate-solubilizing rhizobacteria on the performance of field-grown chickpea. *Journal of Plant Nutrition and Soil Science-Zeitschrift Fur Pflanzenernahrung Und Bodenkunde* **2007**, *170*, 283-287.

103. Wierzbowska, J.; Zuk-Golaszewska, K. The impact of nitrogen fertilization and Rhizobium inoculation on the yield and quality of Trigonella foenum-graecum L. *Journal of Elementology* **2014**, *19*, 1109-1117.

104. Yagmur, M.; Kaydan, D. Plant growth and protein ratio of spring sown chickpea with various combinations of rhizobium inoculation, nitrogen fertilizer and irrigation under rainfed condition. *African Journal of Agricultural Research* **2011**, *6*, 2648-2654.

105. Yamakawa, T.; Fukushima, Y. Low inoculum densities of *Bradyrhizobium japonicum* USDA 110 is effective on production of soybean (*Glycine max L*. Merr.) cultivar Fukuyutaka. *Journal of the Faculty of Agriculture Kyushu University* **2014**, *59*, 45-53.

106. Yasmeen, S.; Bano, A. Combined effect of Phosphate Solubilizing Microorganisms, *Rhizobium* and *Enterobacter* on root nodulation and physiology of soybean (*Glycine max L*.). *Communications in Soil Science and Plant Analysis* **2014**, *45*, 2373-2384.

107. Zafar, M.; Abbasi, M.K.; Khan, M.A.; Khaliq, A.; Sultan, T.; Aslam, M. Effect of plant growth-promoting Rhizobacteria on growth, nodulation and nutrient accumulation of lentil under controlled conditions. *Pedosphere* **2012**, *22*, 848-859.

108. Zafar, M.; Abbasi, M.K.; Rahim, N.; Khaliq, A.; Shaheen, A.; Jamil, M.; Shahid, M. Influence of integrated phosphorus supply and plant growth promoting rhizobacteria on growth, nodulation, yield and nutrient uptake in *Phaseolus vulgaris*. *African Journal of Biotechnology* **2011**, *10*, 16793-16807.

109. Zahir, Z.A.; Yasin, H.M.; Naveed, M.; Anjum, M.A.; Khalid, M. L-Tryptophan application enhances the effectiveness of *Rhizobium* inoculation for improving growth and yield of mungbean (*Vigna radiata* (*L*.) Wilczek). *Pakistan Journal of Botany* **2010**, *42*, 1771-1780.

110. Zahir, Z.A.; Zafar-ul-Hye, M.; Sajjad, S.; Naveed, M. Comparative effectiveness of *Pseudomonas* and *Serratia sp c*ontaining ACC-deaminase for coinoculation with *Rhizobium leguminosarum* to improve growth, nodulation, and yield of lentil. *Biol Fertil Soils* **2011**, *47*, 457-465.

111. Zhong, Z.; Nelson, L.M.; Lemke, R.L. Nitrous oxide emissions from grain legumes as affected by wetting/drying cycles and crop residues. *Biol Fertil Soils* **2011**, *47*, 687-699.

112. Zhang, N.N.; Sun, Y.M.; Li, L.; Wang, E.T.; Chen, W.X.; Yuan, H.L. Effects of intercropping and Rhizobium inoculation on yield and rhizosphere bacterial community of faba bean (*Vicia faba L.*). *Biol Fertil Soils* **2010**, *46*, 625-639.

113. Zilli, J.E.; Campo, R.J.; Hungria, M. Effectiveness of *Bradyrhizobium* inoculation at pre-sowing of soybean. *Pesquisa Agropecuaria Brasileira* **2010**, *45*, 335-338.

114. Romdhane, S.; Aouani, M.E.; Trabelsi, M.; de Lajudie, P.; Mhamdi, R. Selection of high nitrogen-fixing rhizobia nodulating chickpea (*Cicer arietinum*) for semi-arid Tunisia. *Journal of Agronomy and Crop Science* **2008**, *194*, 413-420.

115. Romdhane, S.; Trabelsi, M.; Aouani, M.E.; de Lajudie, P.; Mhamdi, R. The diversity of rhizobia nodulating chickpea (*Cicer arietinum*) under water deficiency as a source of more efficient inoculants. *Soil Biology & Biochemistry* **2009**, *41*, 2568-2572.

116. Daba, S.; Haile, M. Effects of rhizobial inoculant and nitrogen fertilizer on yield and nodulation of common bean. *J. Plant Nutr.* **2000**, *23*, 581-591.

117. Akhtar, M.S.; Shakeel, U.; Siddiqui, Z.A. Biocontrol of Fusarium wilt by *Bacillus pumilus*, *Pseudomonas alcaligenes*, and *Rhizobium sp* on lentil. *Turkish Journal of Biology* **2010**, *34*, 1-7, doi:10.3906/biy-0809-12.

118. Albareda, M.; Rodriguez-Navarro, D.N.; Temprano, F.J. Use of sinorhizobium (Ensifer) fredii for soybean inoculants in south Spain. *Eur. J. Agron.* **2009**, *30*, 205-211, doi:10.1016/j.eja.2008.10.002.

119. Argaw, A. Symbiotic effectiveness of inoculation with Bradyrhizobium isolates on soybean [*Glycine max L.*) Merrill] genotypes with different maturities. *Springer Plus* **2014**, *3*, 1-13.

120. Aryal, U.K.; Shah, S.K.; Xu, H.L.; Fujita, M. Growth, nodulation and mycorrhizal colonization in bean plants improved by rhizobial inoculation with organic and chemical fertilization. *Journal of Sustainable Agriculture* **2006**, *29*, 71-83.

121. Aryal, U.K.; Xu, H.L.; Fujita, M. Rhizobia and AM fungal inoculation improve growth and nutrient uptake of bean plants under organic fertilization. *Journal of Sustainable Agriculture* **2003**, *21*, 29-41.

122. Cheema, H.K.; Sharma, P.; Singh, R.; Taggar, G.K.; Khanna, V.; Kooner, B.S. Efficacy and compatibility of insecticides, fungicide and Rhizobium inoculant in combination for seed treatment in chickpea (*Cicer arietinum*). *Indian Journal of Agricultural Sciences* **2009**, *79*, 190-194.

123. Elkoca, E.; Turan, M.; Donmez, M.F. Effects of single, dual and triple inoculations with *Bacillus subtilis*, *Bacillus megaterium* and *Rhizobium leguminosarum bv. phaseoli* on nodulation, nutrient uptake, yield and yield parameters of common bean (*Phaseolus vulgaris L. cv.* 'elkoca-05'). *J. Plant Nutr.* **2010**, *33*, 2104-2119.

124. Fageria, N.K.; Ferreira, E.P.B.; Melo, L.C.; Knupp, A.M. Genotypic Differences in Dry Bean Yield and Yield Components as Influenced by Nitrogen Fertilization and Rhizobia. *Communications in Soil Science and Plant Analysis* **2014**, *45*, 1583-1604.

125. Gangwar, S.; Dubey, M. Effect on N and P uptake by chickpea (*Cicer arietinum L.*) as influenced by micronutrients and biofertilizers. *Legume Research* **2012**, *35*, 164-168.

126. Ghosh, A.; Puste, A.M. Effect of irrigation and inoculation on growth and yield of wheat (*Triticum aestivum*) and lentil (*Lens culinaris*) grown pure and in intercropping systems. *Indian Journal of Agricultural Sciences* **1997**, *67*, 571-574.

127. Ghosh, M.K.; Joseph, S.A. Influence of biofertilizers, foliar application of dap and sulphur sources on yield and yield attributes of summer green gram (*Vigna radiata L*. wilczek). *Legume Research* **2008**, *31*, 232-233.

128. Janat, M.; Kurdali, F. Assessment of injection of liquid rhizobial inoculum and traditional inoculation of soybean under furrow and drip irrigation. *Agrochimica* **2008**, *52*, 1-11.

129. Jarak, M.; Jafari, T.H.; Djuric, S.; Varga, J.G.; Cervenski, J.; Vasic, M.; Colo, J. Plant Growth-Promoting Rhizobacteria in Bean Production. In *V Balkan Symposium on Vegetables and Potatoes*, Balliu, A., Gruda, N., Eds.; Acta Horticulturae; 2012; Volume 960, pp. 409-415.

130. Ferreira, A.P.A.; Pereira Silva, M.A.; Cassetari, A.; Rufini, M.; de Souza Moreira, F.M.; Bastos de Andrade, M.J. Inoculation with rhizobium strains in beans crop. *Ciencia Rural* **2009**, *39*, 2210-2212.

131. de Araujo, F.F.; Hungria, M. Soybean nodulation and yield when co-inoculated with Bacillus subtilis and *Bradyrhizobium japonicum*/*Bradyrhizobium elkanii*. *Pesquisa Agropecuaria Brasileira* **1999**, *34*, 1633-1643.

132. Zilli, J.E.; Ribeiro, K.G.; Campo, R.J.; Hungria, M. Influence of fungicide seed treatment on soybean nodulation and grain yield. *Rev. Bras. Cienc. Solo* **2009**, *33*, 917-923.

133. Valadão, F.C.d.A.; Jakelaitis, A.; Conus, L.A.; Borchartt, L.; Oliveira, A.A.d.; Valadão Junior, D.D. Inoculação das sementes e adubações nitrogenada e molíbdica do feijoeiro-comum, em Rolim de Moura, RO. *Acta Amazonica* **2009**, *39*, 741-747.

134. Rufini, M.; Avelar Ferreira, P.A.; Soares, B.L.; Oliveira, D.P.; Bastos de Andrade, M.J.; de Souza Moreira, F.M. Symbiosis of nitrogen fixing bacteria with common bean in different pH values. *Pesquisa Agropecuaria Brasileira* **2011**, *46*, 81-88.

135. Barros, R.L.N.; de Oliveira, L.B.; de Magalhaes, W.B.; Medici, L.O.; Pimentel, C. Interaction between rizobial inoculation and sowing nitrogen fertilization on yield of common bean crop at dry and rainy seasons. *Semina-Ciencias Agrarias* **2013**, *34*, 1443-1449.

136. de Pelegrin, R.; Mercante, F.M.; Nakase Otsubo, I.M.; Otsubo, A.A. Response of common bean crop to nitrogen fertilization and rhizobium inoculation. *Rev. Bras. Cienc. Solo* **2009**, *33*, 219-226.

137. Nishi, C.Y.M.; Hungria, M. Effects of soybean *Glycine max (L*) Merrill inoculation in a soil with established population of Bradyrhizobium with strains SEMIA 566, 586, 587, 5019, 5079 and 5080. *Pesquisa Agropecuaria Brasileira* **1996**, *31*, 359-368.

138. Olivares, J.; Martin, E.; Recaldemartinez, L. Effect of nitrogen and sulphur application and seed inoculation with *Rhizobium leguminosarum* on the yield of beans (*Vicia faba*) in field trials. *Journal of Agricultural Science* **1982**, *100*, 149-152.

139. Lanier, J.E.; Jordan, D.L.; Spears, J.F.; Wells, R.; Johnson, P.D. Peanut response to inoculation and nitrogen fertilizer. *Agronomy Journal* **2005**, *97*, 79-84.

140. Gan, Y.; Selles, F.; Hanson, K.G.; Zentner, R.P.; McConkey, B.G.; McDonald, C.L. Effect of formulation and placement of *Mesorhizobium* inoculants for chickpea in the semiarid Canadian prairies. *Can. J. Plant Sci.* **2005**, *85*, 555-560.

141. Bhat, T.A.; Gupta, M.; Mandi, S.S.; Ganai, M.A.; Bhat, H.A.; Bhat, J.A.; Wani, I.A.; Dar, M.H. Growth, yield and economics of field pea (Pisum sativum L.) as influenced by phosphorus and bio-fertilizers under subtropical conditions of Jammu. *Journal of Pure and Applied Microbiology* **2013**, *7*, 645-652.

142. Abdelgani, M.E.; Osman, A.G.; Mohamed, S.S. *Restoring soil fertility of desertified lands through biological nitrogen fixation in Sudan*; 2003; pp. 335-338.

143. Almeida, F.F.D.; Araujo, A.P.; Alves, B.J.R. Seeds with high molybdenum concentration improved growth and nitrogen acquisition of rhizobium-inoculated and nitrogen-fertilized common bean plants',. *Rev. Bras. Cienc. Solo* **2013**, *37*, 367-378.

144. da Costa, E.M.; Abrahao Nobrega, R.S.; Martins Ferreira, L.d.V.; Canuto Amaral, F.H.; Azevedo Nobrega, J.C.; Torres da Silva, A.F.; de Souza Moreira, F.M. Growth and yield of the cowpea cultivar BRS Guariba inoculated with rhizobia strains in southwest Piaui. *Semina-Ciencias Agrarias* **2015**, *35*, 3073-3083.

145. de Jensen, C.E.; Percich, J.A.; Graham, P.H. Integrated management strategies of bean root rot with *Bacillus subtilis* and *Rhizobium* in Minnesota. *Field Crops Research* **2002**, *74*, 107-115.

146. Dekhane, S.S.; Khafi, H.R.; Raj, A.D.; Parmar, R.M. Effect of bio fertilizer and fertility levels on yield, protein content and nutrient uptake of cowpea [Vigna unguiculata (L.) Walp.] *Legume Research* **2011**, *34*, 51-54.

147. Díaz-Zorita, M.; Aranguren, J.M.D.; Aguilar, R.; Satorre, E.H. Fertilización fosfatada e inoculación de soja en vertisoles. *Ciencia del suelo* **2010**, *28*, 215-222.

148. El-Khateeb, N.M.M. Influence of *Rhizobium sp* combined with *Trichoderma spp.* on damping-off disease and growth parameters of faba bean plants. *Egyptian Journal of Biological Pest Control* **2014**, *24*, 139-149.

149. Elsheikh, E.A.E.; Elzidany, A.A. Effect of Rhizobium inoculation, organic and chemical fertilizers on proximate composition, in vitro protein digestibility, tannin and sulphur content of faba beans. *Food Chemistry* **1997**, *59*, 41-45.

150. Fouilleux, G.; Revellin, C.; Hartmann, A.; Catroux, G. Increase of *Bradyrhizobium japonicum* numbers in soils and enhanced nodulation of soybean (*Glycine max (L)* merr) using granular inoculants amended with nutrients. *FEMS Microbiol. Ecol.* **1996**, *20*, 173-183.

151. Gan, Y.T.; Warkentin, T.D.; Bing, D.J.; Stevenson, F.C.; McDonald, C.L. Chickpea water use efficiency in relation to cropping system, cultivar, soil nitrogen and Rhizobial inoculation in semiarid environments. *Agricultural Water Management* **2010**, *97*, 1375-1381.

152. Golo, A.L.; Kappes, C.; Carvalho, M.A.C.d.; Yamashita, O.M. Qualidade das sementes de soja com a aplicação de diferentes doses de molibdênio e cobalto. *Revista Brasileira de Sementes* **2009**, *31*, 40-49.

153. Isler, E.; Coskan, A. Effects of Different Bacterium (*Bradyrhizobium japonicum*) Inoculation Techniques on Biological Nitrogen Fixation and Yield of Soybean. *Tarim Bilimleri Dergisi-Journal of Agricultural Sciences* **2009**, *15*, 324-331.

154. Delfin, E.F.; Paterno, E.S.; Torres, F.G.; Santos, P.J.A. Biomass, nitrogen uptakeand fixed nitrogen partitioning in field grown mungbean (*Vigna radiata L*. Wilczek) inoculated with *Bradyrhizobium* sp. *Philippine Journal of Crop Science* **2008**, *33*, 24-33.

155. Denton, M.D.; Pearce, D.J.; Peoples, M.B. Nitrogen contributions from faba bean (*Vicia faba L.*) reliant on soil rhizobia or inoculation. *Plant and Soil* **2012**, *365*, 363-374.

156. Díaz Franco, A.; Magallanes Estala, A.; Aguado Santacruz, A.; Hernández Mendoza, J.L. Soybean response to microbial inoculants in northern Tamaulipas, Mexico. *Revista mexicana de ciencias agrícolas* **2015**, *6*, 227-238.

157. Jalaluddin, M. Effect of inoculation with vam-fungi and bradyrhizobium on growth and yield of soybean in Sindh. *Pakistan Journal of Botany* **2005**, *37*, 169-173.

158. Javaid, A.; Mahmood, N. Growth, nodulation and yield response of soybean to biofertilizers and organic manures. *Pakistan Journal of Botany* **2010**, *42*, 863-871.

159. Javier de Luca, M.; Hungria, M. Plant densities and modulation of symbiotic nitrogen fixation in soybean. *Scientia Agricola* **2014**, *71*, 181-187.

160. Junior, A.F.C.; Oliveira, A.G.; Reis, H.B.; Santos, G.R.; Chagas, L.F.B.; Miller, L.O. Eficiência da inoculação combinada de rizóbio e Trichoderma spp. em diferentes cultivares de feijão-caupi (Vigna unguiculata) no cerrado (Savana Brasileira). *Revista de Ciências Agrárias* **2014**, *37*, 20-28.

161. Kintschev, M.R.; Goulart, A.C.P.; Mercante, F.M. Compatibility between *Rhizobium* inoculation and fungicide application in seeds of common beans. *Summa Phytopathologica* **2014**, *40*, 338-346.

162. Malik, J.K.; Singh, R.; Thenua, O.V.S.; Kumar, A. Response of pigeonpea (*Cajanus cajan*) plus mungbean (*Phaseolus radiatus*) intercropping system to phosphorus and biofertilizers. *Legume Research* **2013**, *36*, 323-330.

163. Marks, B.B.; Megias, M.; Nogueira, M.A.; Hungria, M. Biotechnological potential of rhizobial metabolites to enhance the performance of *Bradyrhizobium spp*. and *Azospirillum brasilense* inoculants with soybean and maize. *Amb Express* **2013**, *3*, doi:10.1186/2191-0855-3-21.

164. Meghvansi, M.K.; Prasad, K.; Harwani, D.; Mahna, S.K. Response of soybean cultivars toward inoculation with three arbuscular mycorrhizal fungi and *Bradyrhizobium japonicum* in the alluvial soil. *European Journal of Soil Biology* **2008**, *44*, 316-323.

165. Mehta, R.S.; Anwar, M.M.; Aishwath, O.P.; Meena, R.S. Growth, yield and quality of fenugreek (Trigonella foenum-graecum L.) as influenced by nitrogen, phosphorus and bio-fertilizers. *Indian Journal of Horticulture* **2012**, *69*, 94-97.

166. Namvar, A.; Sharifi, R.S. Phenological and morphological response of chickpea (*Cicer arietinum L.*) to symbiotic and mineral nitrogen fertilization. *Zemdirbyste-Agriculture* **2011**, *98*, 121-130.

167. Reis Gualter, R.M.; Boddey, R.M.; Rumjanek, N.G.; Reis de Freitas, A.C.; Xavier, G.R. Agronomic efficiency of rhizobia strains in cowpea cultivated in the Pre-Amazon region, in Maranhao state. *Pesquisa Agropecuaria Brasileira* **2011**, *46*, 303-308.

168. Rice, W.A.; Clayton, G.W.; Lupwayi, N.Z.; Olsen, P.E. Evaluation of coated seeds as a Rhizobium delivery system for field pea. *Can. J. Plant Sci.* **2001**, *81*, 247-253.

169. Rufini, M.; Oliveira, D.d.P.; Trochmann, A.; Soares, B.L.; Bastos de Andrade, M.J.; de Souza Moreira, F.M. Bradyrhizobium strains in symbiosis with dwarf pigeon pea under greenhouse and field conditions. *Pesquisa Agropecuaria Brasileira* **2014**, *49*, 197-206.

170. Sharma, S.K.; Johri, B.N.; Ramesh, A.; Joshi, O.P.; Prasad, S.V.S. Selection of Plant Growth-Promoting Pseudomonas spp. That Enhanced Productivity of Soybean-Wheat Cropping System in Central India. *Journal of Microbiology and Biotechnology* **2011**, *21*, 1127-1142.

171. Silva, E.F.d.; Marchetti, M.E.; Souza, L.C.F.d.; Mercante, F.M.; Rodrigues, E.T.; Vitorino, A.C.T. Inoculação do feijoeiro com *Rhizobium tropici* associada à exsudato de Mimosa flocculosa com diferentes doses de nitrogênio. *Bragantia* **2009**, *68*, 443-451.

172. Singh, G.P.; Singh, P.L.; Panwar, A.S. Response of groundnut (Arachis hypogaea) to biofertilizer, organic and inorganic sources of nutrient in North East India. *Legume Research* **2011**, *34*, 196-201.

173. Tena, W.; Wolde-Meskel, E.; Walley, F. Symbiotic efficiency of native and exotic rhizobium strains nodulating lentil (*Lens culinaris Medik*.) in soils of southern Ethiopia. *Agronomy-Basel* **2016**, *6*, 1-10.

174. Uher, D.; Stafa, Z.; Svecnjak, Z.; Redzepovic, S.; Blazinkov, M.; Kaucic, D. Effect of fertilization on yields and fodder value of winter pea cv. Maksimirski ozimi in triticale cv. Clercal mixture. *Mljekarstvo* **2007**, *57*, 229-242.

175. Wani, P.A.; Khan, M.S. Nickel detoxification and plant growth promotion by multi metal resistant plant growth promoting Rhizobium species RL9. *Bulletin of Environmental Contamination and Toxicology* **2013**, *91*, 117-124.

176. Wani, P.A.; Khan, M.S.; Zaidi, A. Effect of metal tolerant plant growth promoting *Bradyrhizobium sp* (vigna) on growth, symbiosis, seed yield and metal uptake by greengram plants. *Chemosphere* **2007**, *70*, 36-45.

177. Xavier, L.J.C.; Germida, J.J. Selective interactions between arbuscular mycorrhizal fungi and Rhizobium leguminosarum bv. viceae enhance pea yield and nutrition. *Biol Fertil Soils* **2003**, *37*, 261-267.

178. Zakeri, H.; Bueckert, R.A.; Schoenau, J.J.; Vandenberg, A.; Lafond, G.P. Controlling indeterminacy in short season lentil by cultivar choice and nitrogen management. *Field Crops Research* **2012**, *131*, 1-8.

179. Zilli, J.E.; Marson, L.C.; Marson, B.F.; Gianluppi, V.; Campo, R.J.; Hungria, M. Soybean inoculation by spraying *Bradyrhizobium* over plants. *Pesquisa Agropecuaria Brasileira* **2008**, *43*, 541-544.

180. Amanuel, G.; Kuhne, R.F.; Tanner, D.G.; Vlek, P.L.G. Biological nitrogen fixation in faba bean (*Vicia faba L*.) in the Ethiopian highlands as affected by P fertilization and inoculation. *Biol Fertil Soils* **2000**, *32*, 353-359.

181. Appunu, C.; Kumar, R.; Mahadevaiah, C.; Sreenivasa, V.; Sen, D.; Dhar, B. Superior symbiotic performance of native bradyrhizobia isolates over foreign inoculants with cowpea cultivars in India. *Legume Research* **2014**, *37*, 175-179.

182. Castro, S.; Cerioni, G.; Giayetto, O.; Fabra, A. Contribución relativa del nitrógeno del suelo y del fijado biológicamente a la economía de la nutrición nitrogenada de maní (Arachis hypogaea L.) en diferentes condiciones de fertilidad. *Agriscientia* **2006**, *23*, 55-66.

183. Hamaoui, B.; Abbadi, J.M.; Burdman, S.; Rashid, A.; Sarig, S.; Okon, Y. Effects of inoculation with *Azospirillum* brasilense on chickpeas (*Cicer arietinum*) and faba beans *(Vicia faba*) under different growth conditions. *Agronomie* **2001**, *21*, 553-560.

184. Mishra, P.K.; Bisht, S.C.; Jeevanandan, K.; Kumar, S.; Bisht, J.K.; Bhatt, J.C. Synergistic effect of inoculating plant growth-promoting *Pseudomonas spp*. and *Rhizobium leguminosarum*-FB1 on growth and nutrient uptake of rajmash (*Phaseolus vulgaris L.*). *Archives of Agronomy and Soil Science* **2014**, *60*, 799-815.

185. Papakosta, D.K.; Veresoglou, D.S. Responses of Soybean Cultivars to Inoculation and Nitrogen Application in Greece in Fields Free of Bradyrhizobium japonicum. *Journal of Agronomy and Crop Science-Zeitschrift Fur Acker Und Pflanzenbau* **1989**, *163*, 275-283.

186. Rajeshkannan, V.; Thangapandian, V.; Muthukumar, T.; Sumathi, C.S. Influence of bioinoculants on growth, nutrient uptake and yield of green gram *Vigna radiata* (*L*.) Wilczek. *Journal of Sustainable Agriculture* **2007**, *31*, 85-109.

187. Sajitha, J.P.; Haripriya, K.; Mahesweri, T.U.; Stella, D. Impact of organic nutrients on yield and quality of garden bean. In *Proceedings of the 1st International Conference on Indigenous Vegetables and Legumes Prospectus for Fighting Poverty, Hunger and Malnutrition*, Chadha, M.L., Kuo, G., Gowda, C.L.L., Eds.; Acta Horticulturae; 2007; pp. 485-487.

188. Goud, R.P.; Reddy, B.B. Effect of Rhizobium inoculation, plant population and phosphorus on growth and yield of summer greengram (*Phaseolus radiatus*). *Progressive Research* **2007**, *2*, 175-176.

189. Singh, R.; Malik, J.K.; Thenua, O.V.S.; Jat, H.S. Effect of phosphorus and bio-fertilizer on productivity, nutrient uptake and economics of pigeonpea (*Cajanus cajan*) plus mung bean (*Phaseolus radiatus*) intercropping system. *Legume Research* **2013**, *36*, 41-48.

190. Tilak, K.; Singh, C.S.; Rana, J.P.S. Effects of Combined Inoculation of *Azospirillum brasilense* with *Rhizobium trifolii*, *Rhizobium meliloti*, and *Rhizobium sp*. (*Cowpea miscellany*) on Nodulation and Yield of Clover (*Trifolium repens*), Lucerne (*Medicaqo sativa*), and Chickpea (*Cicer arietinum*). *Zentralblatt Fur Bakteriologie Parasitenkunde Infektionskrankheiten Und Hygiene Ii Abteilung-Naturwissenschaftliche-Mikrobiologie Der Landwirtschaft Der Technologie* **1981**, *136*, 117-120.

191. Vejsadova, H.; Siblikova, D.; Gryndler, M.; Simon, T.; Miksik, I. Influence of inoculation with *Bradyrhizobium japonicum* and *Glomus claroideum* on seed yield of soybean under greenhouse. *J. Plant Nutr.* **1993**, *16*, 619-629.

192. Vijila, K.; Jebaraj, S. Studies on the improvement of *Rhizobium-* green gram (*Vigna radiata* (*L.*) wilczek) symbiosis in low nutrient, acid stress soils. *Legume Research* **2008**, *31*, 126-129.

193. Zaccardelli, M.; Campanile, F.; Del Galdo, A.; Lupo, F. Selection of *Rhizobium* isolates able to improve productivity of lentil (*Lens culinaris* Medik). *Acta Agric. Scand. Sect. B-Soil Plant Sci.* **2012**, *62*, 256-262.

194. Bhattacharjya, S.; Chandra, R. Effect of inoculation methods of Mesorhizobium ciceri and PGPR in chickpea (*Cicer areietinum L.*) on symbiotic traits, yields, nutrient uptake and soil properties. *Legume Research* **2013**, *36*, 331-337.

195. Brutti, L.; Basurco, J.C.P.; Ljunggren, H.; Martensson, A. Improved soybean production after inoculation with *Bradyrhizobium japonicum*. *Acta Agric. Scand. Sect. B-Soil Plant Sci.* **2001**, *51*, 43-46.

196. El-Essawi, T.M.; Abadi, D. Quality and yield of soybean seeds as affected by inoculation, NPK fertilization, and soil salinity. *Arid Soil Res. Rehabil.* **1990**, *4*, 43-51.

197. Jat, R.S.; Ahlawat, I.P.S. Direct and residual effect of vermicompost, biofertilizers and phosphorus on soil nutrient dynamics and productivity of chickpea-fodder maize sequence. *Journal of Sustainable Agriculture* **2006**, *28*, 41-54.

198. Merbach, W.; Jacob, H.J. Nitrogen fixation and nitrogen fertilization of soybeans. *Isotopes in Environmental and Health Studies* **1996**, *32*, 173-180.

199. Kucuk, C.; Kivanc, M. The effect of Rhizobium spp. inoculation on seed quality of bean in Turkey. *Pakistan journal of biological sciences : PJBS* **2008**, *11*, 1856-1859.

200. Singh, G.; Sekhon, H.S.; Sharma, P. Effect of irrigation and biofertilizer on water use, nodulation, growth and yield of chickpea (*Cicer arietinum L*.). *Archives of Agronomy and Soil Science* **2011**, *57*, 715-726.

201. Sekhon, H.S.; Kaul, J.N.; Dahiya, B.S. Response of lentil to *Rhizobium* inoculation and N fertilizer. *Journal of Agricultural Science* **1978**, *90*, 325-327.

202. Ahmed, Z.I.; and, M.S.A.; auf, C.a. Effect of Rhizobium Inoculation on Growth and Nodule Formation of Green Gram. *International Journal of Agriculture and Biology* **2006**, 235-237.

203. Ahmed, F.E. Interactive effect of nitrogen fertilization and rhizobium inoculation on nodulation and yield of soybean (*Glycine max L*. Merrill). *Global Joournal of Biology, Agriculture and Health Sciences* **2013**, *2*, 169-173.

204. Pineda, P.; Kipenolt, J. Response of bean varieties to inoculation with selected Rhizobium strains in El Salvador. *Turrialba* **1990**, *40*, 410-415.

205. Pineda, P.; Kipenolt, J.A.; Rojas, E. Rhizobium inoculation increases of bean and maize yields in intercrops on farms in the Peruvian Sierra. *Experimental Agriculture* **1994**, *30*, 311-318.

206. Provorov, N.A.; Saimnazarov, U.B.; Bahromov, I.U.; Pulatova, D.Z.; Kozhemyakov, A.P.; Kurbanov, G.A. Effect of rhizobia inoculation on the seed (herbage) production of mungbean (*Phaseolus aureus* Roxb.) grown at Uzbekistan. *Journal of Arid Environments* **1998**, *39*, 569-575.

207. Ray, J.G.; Valsalakumar, N. Arbuscular mycorrhizal fungi and *piriformospora indica* individually and in combination with Rhizobium on green gram. *J. Plant Nutr.* **2010**, *33*, 285-298.

208. Sattar, M.A.; Quader, M.A.; Danso, S.K.A. Nodulation, N2 fixation and yield of chickpea as influenced by host cultivar and Bradyrhizobium strain differences. *Soil Bid. Biochem* **1995**, *27*, 725-727.

209. Sekhon, H.S.; Kaul, J.N.; Dhingra, K.K. Effect of *Rhizobium* inoculation, mulch and nitrogen and phosphorus fertilizers on soya bean (*Glycine max* (*L*.) Merrill). *Journal of Agricultural Science* **1984**, *102*, 475-478.

210. Singh, Y.P.; Sharma, A. Effect of sources of phosphorus and microbial inoculation on productivity, nutrient availability in soil and uptake of nutrients by chickpea (Cicer arietinum) grown on sandy loam soil. *Indian Journal of Agricultural Sciences* **2011**, *81*, 834-837.

211. Singh, M.S. Effects of *Rhizobium,* FYM and chemical fertilizers on legume crops and nutrient status of soil: a review. *Agric Rev* **2005**, *26*.

212. Verma, J.P.; Yadav, J.; Tiwari, K.N.; Jaiswal, D.K. Evaluation of plant growth promoting activities of microbial strains and their effect on growth and yield of chickpea (*Cicer arietinum L.)* in India. *Soil Biology & Biochemistry* **2014**, *70*, 33-37.

213. Yasmeen, T.; Hameed, S.; Tariq, M.; Ali, S. Significance of arbuscular mycorrhizal and bacterial symbionts in a tripartite association with Vigna radiata. *Acta Physiologiae Plantarum* **2012**, *34*, 1519-1528.

214. Young, C.C.; Juang, T.C.; Chao, C.C. Effects of *Rhizobium* and vesicular- arbuscular mycorrhiza inoculations on nodulation, symbiotic nitrogen fixation and soybean yield in subtropical-tropical fields. *Biol Fertil Soils* **1988**, *6*, 165-169.

215. Zaman-Allah, M.; Sifi, B.; L'Taief, B.; El Aouni, M.H.; Drevon, J.J. Rhizobial inoculation and p fertilization response in common bean (*Phaseolus vulgaris*) under glasshouse and field conditions. *Experimental Agriculture* **2007**, *43*, 67-77.

216. Ojha, S.N.; Roy, R.K.; Jha, J.N. Effect of nitrogen phosphorus and Rhizobium inoculation on grain yield of lentil under irrigated condition *Indian Journal of Agronomy* **1977**, *22*, 250-250.

217. Bhalu, V.B.; Sadaria, S.G.; Kaneria, B.B.; Khanpara, V.D. Effect of nitrogen, phosphorus and rhizobium inoculation on yield and quality, N and p uptake and economics of blackgram (Phaseolus-mungo). *Indian Journal of Agronomy* **1995**, *40*, 316-318.

218. Saraf, C.S.; Shivakumar, B.G.; Patil, R.R. Effect of phosphorus, sulphur and seed inoculation on performance of chickpea (*Cicer arietinum*). *Indian Journal of Agronomy* **1997**, *42*, 323-328.

219. Sarkar, R.K.; Karmakar, S.; Chakraborty, A. Response of summer greengram (*Phaseolus-radiatus*) to nitrogen, phosphorus application and bacterial inoculation. *Indian Journal of Agronomy* **1993**, *38*, 578-581.

220. Sudaric, A.; Vrataric, M.; Duvnjak, T.; Majic, I.; Volenik, M. The effectiveness of biological nitrogen fixation in soybean linked to genotype and environment. *Cereal Research Communications* **2008**, *36*, 67-70.

221. Jagdish, P.; Ram, H. Effect of zinc and copper and rhizobium inoculation on nodulation and yield of greengram (*Vigna-radiata*). *Indian Journal of Agricultural Sciences* **1988**, *58*, 230-232.

222. Singh, S.; Saini, S.S.; Singh, B.P. Effect of irrigation, sulphur and seed inoculation on growth, yield and sulphur uptake of chickpea (*Cicer arietinum*) under late-sown conditions. *Indian Journal of Agronomy* **2004**, *49*, 57-59.

223. Kumar, R.P.; Singh, O.N.; Singh, Y.; Dwivedi, S.; Singh, J.P. Effect of integrated nutrient management on growth, yield, nutrient uptake and ecnomics of french bean (*Phaseolus vulgaris*). *Indian Journal of Agricultural Sciences* **2009**, *79*, 122-128.

224. Krishnareddy, S.V.; Ahlawat, I.P.S. Growth and yield response of lentil cultivars to phosphorus, zinc and biofertilizers. *Journal of Agronomy and Crop Science-Zeitschrift Fur Acker Und Pflanzenbau* **1996**, *177*, 49-59.

225. Zilli, J.É.; Marson, L.C.; Marson, B.F.; Rumjanek, N.G.; Xavier, G.R. Contribuição de estirpes de rizóbio para o desenvolvimento e produtividade de grãos de feijão-caupi em Roraima. *Acta Amazonica* **2009**, *39*, 749-757.

226. Bambara, S.; Ndakidemi, P.A. Phaseolus vulgaris response to Rhizobium inoculation, lime and molybdenum in selected low pH soil in Western Cape, South Africa. *African Journal of Agricultural Research* **2010**, *5*, 1804-1811.

227. Elsheikh, E.A.E.; Osman, A.G. *Rhizobium leguminosarum* inoculation decreases damage to faba bean (*Vicia faba*) caused by broad bean mottle bromovirus and bean yellow mosaic potyvirus. *World Journal of Microbiology & Biotechnology* **1995**, *11*, 223-227.

228. Hoque, M.S. Bradyrhizobium technology: a promising substitute for chemical nitrogen fertilizer in Bangladesh agriculture. *Plant and Soil* **1993**, *155*, 337-340.

229. Kunal; Sharma, P. Influence of pesticide-treated seeds on survival of *Mesorhizobium sp cicer*, symbiotic efficiency and yield in chickpea. *Plant Protection Science* **2011**, *48*, 37-43.

230. Mahadkar, U.V.; Saraf, C.S. Effect of Rhizobium inoculation, phosphorus and time and methods of nitrogen application on growth and yield of spring blackgram (*Vigna mungo* (*L*.) Hepper) and its residual effect on succeeding fodder sorghum (*Sorghum vulgare L*.). *Journal of Agricultural Science* **1988**, *110*, 677-679.

231. McKenzie, B.A.; Hill, G.D. Growth and yield of two chickpea (*Cicer arietinum L.*) varieties in Canterbury, New Zealand. *New Zealand Journal of Crop and Horticultural Science* **1995**, *23*, 467-474.

232. Mnasri, B.; Aouani, M.E.; Mhamdi, R. Nodulation and growth of common bean (*Phaseolus vulgaris*) under water deficiency. *Soil Biology & Biochemistry* **2007**, *39*, 1744-1750.

233. Ndakidemi, P.A.; Dakora, F.D.; Nkonya, E.M.; Ringo, D.; Mansoor, H. Yield and economic benefits of common bean (*Phaseolus vulgaris*) and soybean (*Glycine max*) inoculation in northern Tanzania. *Aust. J. Exp. Agric.* **2006**, *46*, 571-577.

234. Fatnassi, I.C.; Chiboub, M.; Saadani, O.; Jebara, M.; Jebara, S.H. Phytostabilization of moderate copper contaminated soils using co-inoculation of *Vicia faba* with plant growth promoting bacteria. *Journal of Basic Microbiology* **2013**, *55*, 303-311.

235. Singh, O.; Gupta, M.; Mittal, V.; Kiran, S.; Nayyar, H.; Gulati, A.; Tewari, R. Novel phosphate solubilizing bacteria '*Pantoea cypripedii* PS1' along with *Enterobacter aerogenes* PS16 and *Rhizobium ciceri* enhance the growth of chickpea (*Cicer arietinum L*.). *Plant Growth Regulation* **2014**, *73*, 79-89.

236. Mandimba, G.R.; Mondibaye, A. Effect of inoculation and N fertilization on soyabean (*Glycine max* (*L*) Merrill) grown in Congo soil. *Biological Agriculture & Horticulture* **1996**, *13*, 197-204.
